## 12 **Originality-Significance Statement**

13 Polyphosphate accumulating organisms (PAOs) affiliated with as-yet-uncultivated *Ca.*  
14 ‘*Accumulibacter phosphatis*’ are increasingly employed in enhanced biological phosphorus  
15 removal (EBPR) processes, a common environmental biotechnology for removing phosphorus  
16 from wastewater and thereby preventing detrimental impacts of nutrient pollution. Under anoxic  
17 conditions, PAOs have been associated with unusually high emissions of the potent greenhouse  
18 gas and denitrification intermediate nitrous oxide. However, the underlying mechanisms and  
19 biological controls on incomplete denitrification by denitrifying *Accumulibacter*, their ecological  
20 interactions with understudied glycogen accumulating organisms (GAOs), and patterns of gene  
21 expression under anoxic conditions are all poorly understood. Here, we describe genomic  
22 features of a previously unrecognized clade of *Accumulibacter* that is putatively adapted to high  
23 rate P uptake under nitrite-driven denitrification and provide evidence that differential gene  
24 expression (namely elevated expression of nitrite reductase compared to nitrous oxide reductase)  
25 by *Accumulibacter* is a key control on nitrous oxide production. Moreover, we document  
26 genomic and transcriptional potential for cooperation and crossfeeding of the denitrification  
27 intermediate nitric oxide between GAOs and PAOs. This is surprising because GAOs are  
28 conventionally considered to be competitors to PAOs, and because nitric oxide is toxic to most  
29 microorganisms at low concentrations. Taken together, our work provides significant new  
30 understanding of metabolic and ecological interactions in EBPR processes that are critical to  
31 environmental protection; demonstrates the potential of previously unrecognized crossfeeding of  
32 the denitrification intermediate nitric oxide; and expands our understanding of genomic features  
33 and clade level diversity of *Accumulibacter*.

34

35 **Abstract**

36 Unusually high accumulation of the potent greenhouse gas nitrous oxide (N<sub>2</sub>O) has previously  
37 been documented in denitrifying biological phosphorus (P) removal bioprocesses, but the roles  
38 of differential denitrification gene expression patterns and ecological interactions between key  
39 functional groups in driving these emissions are not well understood. To address these  
40 knowledge gaps, we applied genome-resolved metagenomics and metatranscriptomics to a  
41 denitrifying bioprocess enriched in as-yet-uncultivated denitrifying polyphosphate accumulating  
42 organisms (PAOs) affiliated with *Candidatus* Accumulibacter. The 6 transcriptionally most  
43 active populations in the community included three co-occurring Accumulibacter strains  
44 affiliated with clades IF (a novel clade identified in this study), IA, and IC, and a competing  
45 glycogen accumulating organism (GAO) affiliated with *Candidatus* Competibacter. Strongly  
46 elevated expression of nitrite reductase compared to nitrous oxide reductase was observed in the  
47 overall community and in Accumulibacter populations, suggesting a strong role for differential  
48 gene expression in driving N<sub>2</sub>O accumulation. Surprisingly, while ~90% of nitrite reductase gene  
49 transcripts mapped to the three co-occurring PAO populations, ~93% of nitric oxide reductase  
50 gene transcripts were expressed by the GAO population. This suggests the potential for  
51 cooperation between GAOs and PAOs in reducing denitrification intermediates. Such  
52 cooperation may benefit the community by reducing the accumulation of toxic nitric oxide.

53 **Keywords:** Accumulibacter phosphatis; Competibacter; DPAO; DGAO; Denitrifying EBPR;  
54 Nitrous oxide; Metatranscriptome

55

56

## 57 **Introduction**

58 Enhanced biological phosphorus removal (EBPR) bioprocesses that rely on as-yet-uncultivated  
59 polyphosphate accumulating organisms (PAOs) are increasingly used for sustainable phosphorus  
60 (P) removal and recovery from wastewater (Stokholm-Bjerregaard et al., 2017). The most  
61 common PAO in most full- and lab-scale EBPR processes affiliates with *Candidatus*  
62 ‘*Accumulibacter phosphatis*’ (herein *Accumulibacter*), and is enriched under cyclic feast  
63 (anaerobic, carbon-rich) and famine (aerobic, carbon-poor) regimes (Wentzel et al., 1986;  
64 Comeau et al., 1986). Intracellular polyphosphate (polyP) reserves are hydrolyzed under  
65 anaerobic conditions to provide energy for uptake and storage of short chain fatty acids, and in  
66 the subsequent aerobic phase PAOs uptake phosphate for PolyP replenishment (Comeau et al.,  
67 1986; Guisasola et al., 2004) In addition to aerobic P uptake, a select subset of PAOs, termed  
68 denitrifying PAOs (DPAOs), are also capable linking P uptake to nitrate ( $\text{NO}_3^-$ ) or nitrite ( $\text{NO}_2^-$ )  
69 reduction under denitrifying (“anoxic” in environmental bioprocess parlance) conditions (Gao et  
70 al., 2017). The activity of DPAOs over  $\text{NO}_2^-$  is particularly interesting when the goal is to  
71 integrate EBPR with the emerging energy efficient shortcut nitrogen (N) removal bioprocesses,  
72 where  $\text{NO}_2^-$  (not  $\text{NO}_3^-$ ) is the key intermediate (Gao et al., 2014). From a process standpoint,  
73 DPAOs offer an intriguing opportunity to couple N and P removal while decreasing carbon and  
74 energy requirements. However, we and others have documented unusually high production of the  
75 undesirable potent greenhouse gas nitrous oxide ( $\text{N}_2\text{O}$ ) in denitrifying EBPR bioprocesses (Zhou  
76 et al., 2012; Wisniewski et al., 2018). Underlying mechanisms for  $\text{N}_2\text{O}$  emissions in DPAO-  
77 enriched bioprocesses, and associated mitigation strategies, are poorly understood. In particular,  
78 while *Accumulibacter* physiology and patterns of gene expression under anaerobic/aerobic  
79 conditions have been reasonably well studied (Comeau et al., 1986; Oehmen et al., 2004;

80 Oyserman et al., 2016), research on anoxic (denitrifying) PAO activity, gene expression patterns,  
81 and ecological interactions, especially when  $\text{NO}_2^-$  (instead of  $\text{NO}_3^-$ ) is the electron acceptor, is  
82 quite limited (Gao et al., 2019).

83 Denitrification is a modular pathway in which  $\text{NO}_3^-$  is enzymatically converted to  $\text{N}_2$  via  
84 step-wise reduction by nitrate reductase (*napAB* or *narG*,  $\text{NO}_3^-$  to  $\text{NO}_2^-$ ), nitrite reductase (*nirS* or  
85 *nirK*,  $\text{NO}_2^-$  to nitric oxide [NO]), nitric oxide reductase (*norBC* or *norZ*, NO to  $\text{N}_2\text{O}$ ), and nitrous  
86 oxide reductase (*nosZ*,  $\text{N}_2\text{O}$  to  $\text{N}_2$ ) (Zumft, 1997). These modular denitrification genes can be  
87 regulated with a certain degree of independence (Graf et al., 2014), leading in some cases to  
88 accumulation of denitrification intermediates such as  $\text{N}_2\text{O}$ . Recent work has shown that microbes  
89 harboring incomplete (truncated) denitrification pathways that lack one or more key  
90 denitrification genes are surprisingly prevalent in both engineered bioprocesses and in natural  
91 systems (Gao, 2019; Philippot et al. 2011; Anantharaman et al. 2016). Indeed, our previous work  
92 on a denitrifying EBPR process highlighted the possibility that flanking non-PAO denitrifying  
93 bacteria lacking nitrous oxide reductase genes may contribute to  $\text{N}_2\text{O}$  generation (Philippot et al.,  
94 2011; Anantharaman et al., 2016; Gao et al., 2019). Although these genomic analyses revealed  
95 the genetic potential for incomplete denitrification, we concurrently documented a complete  
96 denitrification pathway in the dominant PAO population and a prevalent subset of denitrifiers  
97 with nitrous oxide reductase in this system. A better understanding of the role of differential  
98 patterns of gene expression and potential for segregation of denitrification metabolism in DPAO-  
99 enriched bioprocesses is therefore needed to illuminate mechanisms underlying  $\text{N}_2\text{O}$   
100 accumulation.

101 In addition to PAOs, Glycogen Accumulating Organisms (GAOs) are commonly detected  
102 in EBPR bioprocesses, as they are also enriched under the anaerobic carbon-rich feast/ aerobic

103 carbon-depleted famine regime (McIlroy et al., 2014). Gammaproteobacterial GAOs affiliated  
104 with the *Candidatus* ‘Competibacter’ (herein Competibacter) lineage are commonly observed in  
105 these processes (Gregory et al., 2002; Oehmen et al., 2007; McIlroy et al., 2014). While GAOs  
106 do not accumulate P, they compete with PAOs for fatty acids during the anaerobic feast period.  
107 GAOs are thus widely viewed as undesirable competitors to PAOs that negatively affect the P  
108 removal efficiency (Stokholm-Bjerregaard et al., 2017). Current interpretations on the potential  
109 interactions between the GAOs and PAOs have focused largely on this competition (Stokholm-  
110 Bjerregaard et al., 2017). However, recent work indicates that GAOs may not necessarily be  
111 problematic to the enrichment of PAOs (Nielsen et al., 2019). Additional work has suggested the  
112 potential collaboration between GAOs and PAOs in denitrification via cross-feeding of  $\text{NO}_2^-$ , as  
113 DPAOs are not always able to reduce  $\text{NO}_3^-$  (Rubio-Rincon et al., 2017). Ecological interactions  
114 and potential for similar cross-feeding to influence NO and  $\text{N}_2\text{O}$  fate is currently unknown.

115 Biodiversity has been reported in both *Accumulibacter* PAO populations and in  
116 *Competibacter* GAO populations. Based on the phylogeny of the *ppk1* gene, PAOs affiliated  
117 with the *Accumulibacter* genus are classified into two types (I and II), and 14 clades (IA to IE  
118 and IIA to II-I) (Camejo et al., 2016; Zhang et al., 2016). Similarly, the intragroup identity of the  
119 16S rRNA gene annotated at > 89% suggested the microdiversity of *Competibacter* GAO  
120 populations (McIlroy et al., 2014). While the composition of PAO and GAO populations are  
121 known to differ in various EBPR systems and process variations (Albertsen et al., 2016; Rubio-  
122 Rincon et al., 2017), it is not well understood how or if clade-level phylogenetic differentiation  
123 aligns with emergent phenotypic variation (e.g. capacity for denitrification or propensity for  
124 cross-feeding or  $\text{N}_2\text{O}$  production).

125 Another long-standing enigma in understanding the microbiology of EBPR bioprocess is:  
126 are the flanking (e.g. non-PAO) populations necessary and how is the biodiversity maintained in  
127 the system? Although *Accumulibacter* PAO populations have been reported being enriched to an  
128 abundance as high as ~90% (FISH-based quantification) in lab-scale EBPR reactors (Lu et al.,  
129 2006), no lab grown isolates are available to support the phenotypic characterization of the  
130 *Accumulibacter* strains (Zhang et al., 2019). A better understanding on the functional niches of  
131 the flanking populations in EBPR processes may shed light on the potential metabolic network  
132 between the PAOs and the flanking populations and may also provide hints to guide the  
133 enrichment or cultivation of the *Accumulibacter* PAO populations (Handelsman et al., 2004;  
134 Lawson et al. 2017; Oyserman et al. 2016; He et al. 2015).

135 The objective of this study was to investigate how DPAOs, GAOs, and flanking  
136 microbial populations with complete or truncated denitrification pathways interact to convert  
137  $\text{NO}_2^-$  to  $\text{N}_2\text{O}$  in denitrifying EBPR processes. To this end, we used genome-centric metagenome  
138 and metatranscriptomic sequencing analyses to characterize highly active populations, patterns  
139 of gene expression, and potential metabolic interactions among active populations in a DPAO  
140 enriched bioprocess previously shown to generate high levels of  $\text{N}_2\text{O}$  via incomplete  
141 denitrification (Gao et al., 2017, Gao et al., 2019). Our results reveal a novel clade of  
142 *Accumulibacter* putatively adapted to high rate denitrifying P uptake, provide evidence that  
143 differential PAO and GAO denitrification gene expression in addition to prevalent truncated  
144 denitrification pathways in the flanking community underlie  $\text{N}_2\text{O}$  emissions, and suggest a  
145 previously unobserved cooperation between *Accumulibacter* and *Competibacter* via cross-  
146 feeding of the denitrification intermediate  $\text{NO}$ .

147

## 148 **Results**

### 149 *Denitrifying EBPR Process Characterization*

150 We operated a lab-scale (12 L working volume) denitrifying EBPR sequencing batch reactor fed  
151 with synthetic municipal wastewater with cyclic anaerobic/ anoxic phases and a short aerobic  
152 polishing phase for N and P removal over  $\text{NO}_2^-$  for over 3 years. Operational and performance  
153 characteristics were described previously (Gao et al., 2017). Briefly, during each cycle, acetate or  
154 propionate was dosed to initiate the anaerobic phase, and  $\text{NO}_2^-$  was dosed at the start of the  
155 anoxic phase to simulate effluent from an upstream nitrification reactor. We documented high rate  
156 and stable N and P removal accompanied by a substantial production of  $\text{N}_2\text{O}$  via incomplete  
157 denitrification (60-80% of the influent N). During steady-state operation, we chose  
158 representative cycles with different primary carbon sources (acetate or propionate) as feed to  
159 profile gene expression across different redox conditions. A summary of the conversion of the  
160 key C, N and P constituents in this system during these cycles is provided in Figure 1 and Table  
161 1. Regardless of the carbon source, COD was rapidly consumed. COD consumption rates were  
162 not significantly different for acetate compared to propionate (ANOVA p-value>0.05). However,  
163 we observed higher N removal rate (ANOVA p-value=0.004) and higher  $\text{N}_2\text{O}$  production  
164 (ANOVA p-value=0.033) when propionate was fed as the primary carbon source. The P uptake  
165 rates over  $\text{NO}_2^-$  were comparable (ANOVA p-value>0.05) between the two carbon sources;  
166 however, when propionate was supplied as the external carbon source (electron donor), the P-  
167 release/C-uptake value (ANOVA p-value=0.016) and overall P-removal efficiency (ANOVA p-  
168 value=0.021) were significantly higher. To profile gene expression patterns during SBR  
169 operation, we selected a representative cycle for each carbon source to monitor key



170 denitrification genes *nirS* and *nosZ* via RT-qPCR (Table S2). Based on the RT-qPCR results, a  
171 single sample in each redox condition (six in total) was selected for metatranscriptomic analyses.

172 It is noteworthy that the P-uptake rate over  $\text{NO}_2^-$  in this DPAO-enriched consortia was ~3  
173 times higher than the aerobic P-uptake rate after 3 years of operation (Table 1). In contrast, the  
174 anoxic P-uptake /aerobic P-uptake ratio was ~1.0 in our previous characterization conducted  
175 after 7 months of the reactor operation (Gao et al., 2017).  $\text{NO}_3^-$  and  $\text{NO}_2^-$  are typically regarded  
176 as less efficient electron acceptors for P uptake by PAOs than oxygen, and the denitrifying P  
177 uptake rate is generally lower than the aerobic P uptake rate (Kern-Jespersen et al., 1993). The  
178 highest ratio between the anoxic P-uptake rate and the aerobic P-uptake rate reported in literature  
179 is 0.8:1 (Hu et al., 2002). The elevated activity of P-uptake over  $\text{NO}_2^-$  coupled to high  $\text{N}_2\text{O}$   
180 generation as observed in this study is therefore particularly interesting and suggests a strong  
181 adaption in this DPAO-enriched biomass to denitrifying conditions. This led us to hypothesize  
182 the selection for novel PAO genotypes in this system that correspond with this unique phenotype  
183 of proficient  $\text{NO}_2^-$  utilization.

184

185 *PAO microdiversity, identification of a novel Accumulibacter clade, and potential for clade*  
186 *segregation between aggregate size fractions*

187 To profile strain level Accumulibacter diversity, we employed Accumulibacter-specific *ppk1*  
188 cloning and sequencing (35 gene sequences), coupled to *in silico* extraction of *ppk1* genes from  
189 assembled metagenomic contigs (13 unique gene sequences) and from an Accumulibacter  
190 metagenome assembled genome (MAG) described below (Acc-IF). Phylogenetic analysis of the  
191 *ppk1* genes (Figure 2) in this DPAO consortia indicated that the Accumulibacter populations  
192 were all of Type I, and affiliated with five clades: IA, IB, IC, ID and a distinct new clade, herein

193 termed clade IF. The identity between the *ppk1* genes in this distinct new clade and the *ppk1*  
194 genes in the other clades is less than 89.0%. Among the 952 *ppk1* genes downloaded from NCBI,  
195 only one *ppk1* gene (KF772928.1) robustly clustered with the clade IF *ppk1* genes obtained in  
196 this study, and the highest sequence identity was ~99.9%. No publicly available genomes  
197 affiliate with this novel clade, and to our knowledge, no enrichment cultures nor phenotypic or  
198 genotypic characterizations have been described in the literature.

199 While we operated this system for suspended growth (floccular) biomass, granules were  
200 formed in this denitrifying EBPR reactor without intentional selection. To understand the  
201 potential for population segregation between aggregate types (large granules versus smaller  
202 flocs), relative abundances of *Accumulibacter* clades in granules and in the suspended biomass  
203 were evaluated according to the DNA-RPKM values calculated from metagenomic sequencing  
204 analyses (Figure S1). The DNA-RPKM values were calculated by mapping the metagenomic  
205 DNA reads of the larger sludge particulates (diameter  $\geq 350 \mu\text{m}$ ) and the metagenomic DNA  
206 reads of the smaller sludge particulates (diameter  $< 350 \mu\text{m}$ ) to the *ppk1* genes of the five clades,  
207 respectively. We found that *Accumulibacter* clade IA was significantly enriched in larger sludge  
208 particulates (or in granules), while the *Accumulibacter ppk1* genes of clade IF and clade IC were  
209 of higher ratio in smaller sludge particulates (suspended biomass). *Accumulibacter ppk1* genes in  
210 clades IB and ID were of relatively low abundance in the community.

### 211 *Genome-centric profiling of the microbial populations in the DPAO consortia*

212 We assembled 32 high quality (completeness  $>85\%$ , contamination  $<5\%$ ) MAGs from this  
213 denitrifying EBPR process via analysis of shotgun metagenome data (summarized in Table 2).  
214 These 32 MAGs phylogenetically affiliate with the phyla Proteobacteria (8), Myxococcota (1),

215 Chloroflexota (7), Verrucomicrobiota(4) and Bacteroidota (12) (taxonomic affiliations are in  
216 accord with the Genome Taxonomy Database (Parks et al., 2018). MAG phylogeny is shown in  
217 Figure 3. 21 out of these 32 MAGs were significantly divergent from currently available  
218 genomes, being annotated with an ANI <85% to currently available reference genomes (see  
219 Table S1 for accession numbers for publicly available reference genomes that are of the highest  
220 ANI value to each of the 32 MAGs). We recovered a single high quality Accumulibacter MAG  
221 (Acc-IF, affiliated with the proposed clade IF) and Competibacter MAG (GAO1) from this  
222 analysis. Both of these MAGs represent genotypes distinct from the currently available  
223 Accumulibacter and Competibacter genomes. The highest ANI between Acc-IF and 24 publicly  
224 available Accumulibacter reference genomes is 82% (Figure S2), and the highest ANI between  
225 GAO1 and 19 Competibacter reference genomes is 78% (Figure S3).

226 We estimated relative abundances of the microbial populations corresponding to each of  
227 the 32 MAGs based on the DNA-RPKM values calculated from DNA reads mapping, and the  
228 associated transcriptional activity (relative gene expression) was estimated based on the RNA-  
229 RPKM values calculated from mRNA reads mapping. Results are shown in Figure 4. The RNA-  
230 RPKM values of each MAG were averaged across the data at the 6 time points, and the DNA-  
231 RPKM values of each MAG were averaged across the values calculated in larger granules,  
232 smaller flocs and in the total biomass. As has been summarized above, phylogeny of the *ppkI*  
233 genes suggested the presence of Accumulibacter populations in five distinct type I clades (IA, IB,  
234 IC, ID and IF). However, only one Accumulibacter MAG with ~96% completeness and ~4%  
235 contamination (Acc-IF, affiliated with the proposed clade IF) was recovered through the draft  
236 genome binning efforts in this study. We previously recovered composite Accumulibacter MAGs  
237 from this reactor affiliated with clades IA and IC (Gao et al., 2019). Populations of these two

238 clades were also still present in this reactor, based on *ppk1* gene cloning/ sequencing and analysis  
239 of metagenomic contigs (Fig. 2), but were not sufficiently abundant to re-assemble MAGs. To  
240 facilitate the investigation of the abundance and the transcriptional activities of the diverse  
241 *Accumulibacter* populations in this reactor, together with the one Acc-IF MAG recovered in this  
242 study, we therefore included these two reference *Accumulibacter* MAGs in clade IA and clade  
243 IC as well as a reference clade IB *Accumulibacter* MAG of clade IB downloaded from NCBI  
244 (Skenner et al., 2014) in the genome-centric transcriptional analyses. No reference genome of  
245 *Accumulibacter* clade ID is available, so this clade was not included in our downstream analysis.  
246 Taken together, contigs from the 32 MAGs and the three reference *Accumulibacter* MAGs  
247 accounted for  $45 \pm 2.6\%$  of the total DNA reads and  $70.8 \pm 3.8\%$  of the total mRNA reads.

248         Interestingly, as shown in Figure 4, the populations detected with the highest relative  
249 abundance (CH7, PR6) were not the ones annotated with the highest transcriptional activities  
250 (Acc-IF, Acc-IA and Acc-IC). The metatranscriptome data indicated that Acc-IF was the most  
251 transcriptionally active population in the community. Acc-IF alone accounted for 41% of the  
252 mRNA reads mapped to the 32 MAGs and the three reference *Accumulibacter* genomes, while  
253 its abundance based on the DNA reads mapping was only ~2%. The other two highly active  
254 *Accumulibacter* populations represented by Acc-IC and Acc-IA, respectively, accounted for 22%  
255 and 16% of the mRNA reads mapped, respectively, but were also present at the timepoint of  
256 sampling at relatively low abundance (~1%). On the other hand, the two flanking populations  
257 PR6 and CH7, to which only 3-5% of the mRNA reads were mapped, represented 15% and 35%  
258 of the metagenome DNA reads, respectively. The stark variation between abundance (based on  
259 metagenomic sequencing) and transcriptional activity (based on metatranscriptomic sequencing)  
260 is surprising. Because they reflect gene expression patterns rather than genomic potential, RNA-

261 seq based transcriptional analyses are commonly thought to more accurately reflect functional  
262 activity than the DNA-seq based metagenomic analyses (Oyserman et al., 2016). The top 6  
263 transcriptionally most active populations (Accumulibacter Acc-IF, Acc-IC, Acc-IA,  
264 Competibacter GAO1, CH7 and *Pseudoxanthomonas* PR6) accounted for 92% of the mRNA  
265 reads mapped to the 32 MAGs and the three reference Accumulibacter genomes. By comparison,  
266 the transcriptional activities of the populations represented by the other 28 MAGs and the  
267 Accumulibacter reference genome Acc-IB were very weak.

### 268 *Truncated denitrification pathways and differential gene expression as controls on N<sub>2</sub>O* 269 *production*

270 Substantial accumulation of N<sub>2</sub>O (60-80% of N fed to the system) from NO<sub>2</sub><sup>-</sup> reduction was  
271 detected in this denitrifying EBPR bioprocess. To identify putative NO<sub>2</sub><sup>-</sup> reducers and N<sub>2</sub>O  
272 producers in the community and to understand the underlying mechanisms for N<sub>2</sub>O accumulation,  
273 we queried all MAGs for the presence/absence and the expression of the core denitrification  
274 genes *napAB*, *narG*, *nirS*, *nirK*, *norBC*, *norZ*, and *nosZ*. As summarized in Figure 5, among the  
275 32 MAGs recovered in this study, 2 MAGs (BA7 and VE3) contained no denitrification genes,  
276 and only 3 MAGs (Acc-IF, BA4 and MY1) harbored a complete denitrification pathway (that is,  
277 genomic machinery for reduction of NO<sub>3</sub><sup>-</sup> to N<sub>2</sub>). In contrast, a large proportion (27 out of 32) of  
278 recovered MAGs harbored truncated (incomplete) denitrification pathways that lacked one or  
279 more key denitrification genes. This group included the single putative GAO (Competibacter,  
280 GAO1) that harbored genes for nitrate, nitrite, and nitric oxide reductase (*narG*, *nirS*, and *norB*),  
281 but lacked nitrous oxide reductase (*nosZ*). Taken together, these results demonstrate a high  
282 prevalence of genomes that harbor incomplete denitrification pathways---that is, that harbor  
283 genomic capacity to catalyze at least one step of the reduction of NO<sub>3</sub><sup>-</sup> to N<sub>2</sub>, but not genes

284 encoding the complete denitrification pathway. This result is consistent with our metagenomic  
285 analyses in this system at an earlier stage of operation that also demonstrated highly prevalent  
286 incomplete denitrifiers (Gao et al., 2019). However, these results demonstrate genomic potential,  
287 but not expression, of denitrification genes. To assess how genomic potential relates to gene  
288 expression and associated reactor phenotype in this system, we employed metatranscriptomic  
289 sequence data to investigate the expression of genes related to N metabolisms.

290 To explore whether differential gene expression may be linked to the unusually high  
291 levels of N<sub>2</sub>O production we observed in this reactor, we first compared expression of *nirS* and  
292 *nosZ* in both the overall community and by *Accumulibacter* populations. Denitrification gene  
293 expression based on metatranscriptomic sequencing analyses is summarized in Figure 6. The  
294 *nirS* gene (RNA-RPKM value of 3351), not the *nirK* gene (RNA-RPKM value of 24), was the  
295 dominant nitrite reductase gene in this consortium. Consistent with the overall transcriptional  
296 activity, ~93% of the denitrification gene transcripts also mapped to the top 6 transcriptionally  
297 active MAGs (Acc-IF, Acc-IA, Acc-IC, GAO1, CH7, and PR6). Our analysis revealed strongly  
298 elevated transcriptional activity of *nirS* (nitrite reductase) compared to *nosZ* (nitrous oxide  
299 reductase) in both the overall community and in the three highly active *Accumulibacter* MAGs.  
300 ~90% of the *nirS* gene transcripts were associated with the three *Accumulibacter* MAGs Acc-IF  
301 (~45%), Acc-IA (35%) and Acc-IC (10%), suggesting that denitrifying PAOs were the major  
302 denitrifiers utilizing NO<sub>2</sub><sup>-</sup>. Similarly, *nosZ* gene transcripts were also predominantly associated  
303 with the *Accumulibacter* MAGs: Acc-IF (~37%) and Acc-IA (33%). However, the expression  
304 levels of the *nirS* gene versus the *nosZ* gene were highly imbalanced in the *Accumulibacter*  
305 populations, and the RNA-RPKM values of the *nirS* gene were ~7 times larger than that of the  
306 *nosZ* gene. Similarly, under all conditions, the global expression of *nirS* (average

307 RPKM=2832.3±788.0) was significantly higher compared to *nosZ* (average RPKM=775.7±199.4)  
308 (ANOVA p-value=0.0001). We previously observed that the Acc-IC genome encoded no nitric  
309 oxide reductase gene and an incomplete *nosZ* with stop codons within the ORF (Gao et al., 2019).  
310 Consistent with this observation, the RPKM value for Acc-IC associated *nosZ* was less than 3 for  
311 all the 6 sampling points, suggesting a non-functional *nosZ* gene in the Acc-IC population in our  
312 reactor. Taken together, the imbalance in expression levels of *nirS* versus *nosZ* genes in  
313 Accumulibacter draft genomes suggests that Accumulibacter is likely an active NO<sub>2</sub><sup>-</sup> reducer (as  
314 evidenced by high denitrifying P uptake, Table 1), and the low transcription activity of *nosZ*  
315 gene in Accumulibacter populations may have induced the N<sub>2</sub>O accumulation.

#### 316 *Potential cooperation between GAOs and PAOs and putative N<sub>2</sub>O producers and consumers*

317 Our analysis revealed a surprising potential segregation of denitrification metabolism and  
318 cooperative cross-feeding between the PAO (Accumulibacter) populations and the GAO  
319 population. While the three Accumulibacter MAGs accounted for the vast majority of nitrate  
320 reductase (*narG* and *napAB*), nitrite reductase (*nirS*), and nitrous oxide (*nosZ*) gene transcripts,  
321 ~93% of the *norB* gene transcripts were associated with the *Competibacter* MAG GAO1 (Figure  
322 6). This suggested that GAO1 was the dominant NO reducer and N<sub>2</sub>O producer in this system. It  
323 should be noted that expression of NOR (*norB* or *norZ*) was low compared to both *nirS* and *nosZ*.  
324 Although *norB* genes were annotated in both Acc-IA and Acc-IF, the *norB* genes were not highly  
325 expressed in these *Accumulibacter* MAGs. Interestingly, similar to several other publicly  
326 available *Accumulibacter* genomes (Flowers et al., 2013; Camejo et al., 2019; Speth et al., 2016),  
327 a nitric oxide reductase gene (*norB* or *norZ*) was not identified in Acc-IC. The strong differences  
328 in *norB* versus *nirS* gene expression between PAO and GAO populations suggest the possibility



329 for metabolic segregation of denitrification and cooperative cross-feeding of NO between  
330 Accumulibacter and Competibacter.

331 As discussed above, in addition to dominating *norB* transcriptional activity in this  
332 community, GAO1 also lacks a *nosZ* gene and is therefore incapable of N<sub>2</sub>O reduction. PR6 is  
333 similarly a putative N<sub>2</sub>O producer, based on the presence of an incomplete denitrification  
334 pathway lacking genomic potential for N<sub>2</sub>O reduction (Figure 5). It is therefore likely that GAO1  
335 and PR6 are key N<sub>2</sub>O producers in this denitrifying EBPR system, as both GAO1 and PR6 lack  
336 genomic potential for N<sub>2</sub>O consumption, while they account for the majority of the  
337 transcriptional activity of the *norB* gene and the *norZ* gene, respectively. Conversely, our  
338 analyses suggest that the flanking population CH7 may be an important N<sub>2</sub>O consumer in this  
339 community, due to the fact that expression of *nosZ* in CH7 was higher than that of *nirS*,  
340 particularly under anoxic and aerobic conditions (Figure S4). Interestingly, no nitric oxide  
341 reductase genes were annotated in CH7.

342

### 343 *Transcriptional activity of genes involved in acetate and propionate utilization*

344 Based on comparative kinetic analyses between SBR cycles utilizing acetate and propionate as  
345 the primary carbon source (see Table 1), differences in terms of P removal efficiency (as well as  
346 P-release/C-uptake) and N<sub>2</sub>O production were observed. To understand the impact of and  
347 competition for primary carbon sources among bacterial taxa in this denitrifying EBPR system,  
348 we explored the genome-specific expression of two genes responsible for the activation of  
349 acetate, acetyl-coenzyme A synthase (*acs*, high affinity) and acetate kinase (*ackA*, low affinity),  
350 and the gene related to propionate activation, propionyl-CoA synthetase (*prpE*) (Figure 7).  
351 Compared with the genomic potential for propionate activation, the capability for utilizing



352 acetate was more widespread among the MAGs. Only 2 out of the 32 MAGs lacked acetate  
353 activation genes, while only 6 harbored propionate activation gene (Figure 7a). As summarized  
354 in Figure 7b, over 95% of the *acs*, *ackA* and *prpE* gene transcripts mapped to the three PAO  
355 MAGs (Acc-IF, Acc-IA, Acc-IC) and the one GAO MAG (GAO1), confirming that their ability  
356 to efficiently sequester these VFAs during the anaerobic period likely gave these PAOs and  
357 GAOs a selective advantage over other members of the community for subsequent  $\text{NO}_2^-$   
358 denitrification. The expression of the high affinity *ackA* gene was substantially higher (~5-fold)  
359 than the low affinity *acs* gene in the PAO and GAO populations, with the exception that Acc-IA  
360 expressed an equal amount of the *ackA* and *acs* gene transcripts, both at low levels. By  
361 comparing the expression activity of the *acs*, *ackA* and *prpE* genes, putative variations in the  
362 preferred carbon sources between PAOs and GAOs as well as between the three *Accumulibacter*  
363 genomes were revealed. On average, Acc-IF, Acc-IA, Acc-IC and GAO1 accounted for  
364  $42.0 \pm 2.7\%$ ,  $19.7 \pm 1.9\%$ ,  $26.0 \pm 2.9\%$  and  $10.9 \pm 1.2\%$  of the total *prpE* gene transcripts,  
365 respectively. Comparing with the *prpE* gene, the expression of *acs* gene was more evenly  
366 distributed, with Acc-IF, Acc-IA, Acc-IC and GAO1 accounting for  $35.1 \pm 2.5\%$ ,  $9.2 \pm 2.4\%$ ,  
367  $32.1 \pm 5.0\%$ , and  $17.1 \pm 1.6\%$  of the *acs* gene transcripts, respectively. These results suggest that  
368 GAO1 may utilize a higher portion of the primary carbon source when acetate rather propionate  
369 was fed into the reactors.

370

### 371 *Carbon and Energy Metabolism and Potential Metabolite Exchange among PAOs and Flanking* 372 *Populations*

373 Figure S6 shows the gene expression profiles and dynamics of major carbon, energy and  
374 phosphate metabolic pathways across the top six identified highly active MAGs. Apart from their

375 key functional role in polyP accumulation, as expected, genes involved in both glycolysis and the  
376 TCA cycle were annotated as being actively expressed in the three *Accumulibacter* populations  
377 of clade IF, IC and IA, and poly(3-hydroxyalkanoate) polymerase subunits *PhaE/ PhaC* involved  
378 in PHA synthesis were also highly expressed in these populations. In addition, all three  
379 *Accumulibacter* populations, especially Acc-IF, were identified as being dominant in the  
380 expression of genes involved in EPS synthesis, in the biosynthesis of type IV pilus, in amino acid  
381 metabolism, and in the biosynthesis of co-factors like vitamin B12 and Biotin (Figure S5 and  
382 Figure S6).

383         Among the 31 MAGs we recovered representing flanking non-PAO populations, only 3  
384 were identified as being highly transcriptionally active: GAO1 (*Competibacter*), CH7 (affiliated  
385 with the class Anaerolineae) and PR6 (affiliated with the genus *Pseudoxanthomonas*). These  
386 flanking populations were all heterotrophs, with no carbon fixation pathway identified in their  
387 genomes. All MAGs expressed genes involved in central carbon metabolic pathways, including  
388 the TCA cycle, pyruvate metabolism, pentose phosphate pathway (PPP) and  
389 glycolysis/gluconeogenesis (Figure S6). Whereas GAO1 likely utilizes acetate and propionate as  
390 its primary carbon source based on gene expression patterns, the expression levels of *acs* and  
391 *ackA* genes for acetate activation were comparatively low in both CH7 and PR6. Moreover, CH7  
392 is apparently incapable of utilizing propionate, since no *prpE* gene was identified in its genome.  
393 As summarized in Figure S5, 88% of the *vpr* gene transcripts for extracellular protease were  
394 mapped to CH7, and 84% gene transcripts for extracellular serine protease associated with PR6.  
395 Interestingly, both PR6 and CH7 expressed genes encoding glycoside hydrolases (xylosidase,  
396 lysozyme, glucosidase, and isoamylase) and extracellular cellulose binding enzymes that are  
397 linked to the breakdown of polysaccharides such as xylan, starch and peptidoglycan (Figure S7).

398 These results suggest that CH7 and PR6 may scavenge extracellular substances (endogenous  
399 organic carbon) excreted by the PAO populations as their primary carbon sources. In addition,  
400 the vitamin B12 transporter *btuB* gene and *tonB* gene were highly expressed in PR6 (Figure S5).  
401 *TonB* was reported as being essential in importing essential micronutrients across the outer cell  
402 membrane (Shultis et al., 2016). PR6 also contributed 33% of the *PilQ* and *PilYI* gene transcripts  
403 for type IV pilus biogenesis, and therefore may play a supporting role the three *Accumulibacter*  
404 populations in aggregate (biofilm) formation. Based on patterns of gene expression in carbon,  
405 nitrogen, and P cycling, a conceptual schematic of hypothesized metabolic interactions between  
406 the *Accumulibacter* population, GAO1, and the flanking population CH7 in this DPAO-enriched  
407 consortium is shown in Figure 8.

408

## 409 **Discussion**

### 410 *Segregation of denitrification metabolism between GAOs and PAOs*

411 Denitrification is a modular metabolic process in which  $\text{NO}_3^-$  or  $\text{NO}_2^-$  is sequentially reduced to  
412  $\text{N}_2$  via metabolic intermediates NO and  $\text{N}_2\text{O}$ . While denitrification to  $\text{N}_2$  is commonly assumed  
413 to rely on activity of denitrifying taxa with complete denitrification pathways, it is predicted that  
414 segregating metabolic processes into different cell types would eliminate inter-enzyme  
415 competition and reduce the accumulation of metabolic intermediates. Such segregation has been  
416 proposed to be especially beneficial when the metabolic intermediates are toxic and growth-  
417 inhibiting (Liljia and Johnson, 2016). In the DPAO-enriched consortia that is the focus of this  
418 study, denitrification gene transcripts coupled to genome-resolved metagenomic analyses  
419 suggested a potential segregation of  $\text{NO}_2^-$  and NO reduction into PAO and GAO populations,

420 respectively, as ~90% of the nitrite reductase gene transcripts were expressed by three co-  
421 occurring PAO populations, while ~93% of the nitric oxide reductase gene transcripts were  
422 expressed by the one GAO population.

423 This hypothesized segregation and cross feeding of NO is in accordance with our  
424 previous evaluation on the evolution of the denitrification traits within *Accumulibacter*  
425 genotypes: periplasmic nitrate reductase (*napAGH*), cytochrome cd1 nitrite reductase (*nirS*), and  
426 the nitrous oxide reductase (*nosZDFL*) were identified as core genes to all type I *Accumulibacter*  
427 populations, while nitric oxide reductase (*norB*) was annotated as a flexible gene for both type I  
428 and type II *Accumulibacter*. Moreover, a nitric oxide reductase gene was not annotated in one  
429 *Accumulibacter* MAG Acc-IC recovered from this system (Gao et al., 2019). This finding is  
430 surprising given that NO is toxic to most microorganisms at low concentrations, but is consistent  
431 with other recent studies that found that only a subset of *Accumulibacter* genomes harbor  
432 complete nitric oxide reductase genes (Flowers et al., 2013; Camejo et al., 2016; Mao et al.,  
433 2014). Additional work focused on non-PAO denitrifiers has also documented a puzzling lack of  
434 canonical *nor* genes (Grat et al., 2014; Speth et al., 2016; Hallin et al., 2018). Moreover, in an  
435 *Accumulibacter* enrichment culture operated with cyclic anaerobic/ microaerobic conditions,  
436 Camejo et al. documented very low expression of *nor* compared to *nirS* and *nosZ* under  
437 microaerobic conditions (Camejo et al., 2019). This is consistent with our results, where *nor*  
438 expression was much lower than *nirS* and *nosZ* both in the overall community and in  
439 *Accumulibacter* populations. It is also consistent with metaproteomic analyses by Barr et al.  
440 (Barr et al., 2016), who detected nitrite and nitrous oxide reductase proteins but no nitric oxide  
441 reductase proteins in an *Accumulibacter*-enriched biofilm, despite presence of a *norZ* gene in the  
442 *Accumulibacter* genome. Camejo et al. speculated that the lack of *nor* in many *Accumulibacter*

443 genomes may be linked to NO cross feeding and consumption with the flanking non-PAO  
444 community (Camejo et al., 2016). Based on genome-resolved metagenomics analyses of a partial  
445 nitrification/anammox reactor, Speth et al. speculated that NO might be released into the solution  
446 as a denitrification intermediate that might be further removed through aeration or be cross fed to  
447 anammox to be further metabolized to N<sub>2</sub>, as few populations annotated with a *nirS/K* gene were  
448 also annotated with a *norBC/Z* gene (Speth et al., 2016). Similarly, potential segregation of NO  
449 and the NO<sub>2</sub><sup>-</sup> reduction among different populations was also suggested based on  
450 metatranscriptomic sequencing data of anammox granules (Lawson et al., 2017).

451 While accumulation of the metabolic intermediates NO<sub>2</sub><sup>-</sup> and N<sub>2</sub>O are commonly  
452 reported in denitrifying cultures, reports of substantial NO accumulation is rare (Kampschreue et  
453 al., 2009; Ge et al., 2012; Hassan et al., 2016; Wertz et al., 2018). Based on the integrated meta-  
454 omic analyses here and results from these previous studies, we speculate that the toxicity of NO  
455 may promote metabolic segregation of NO reduction into a population that is different from that  
456 which reduces NO<sub>2</sub><sup>-</sup> to NO. In this DPAO-enriched consortium, patterns of gene expression  
457 suggest that PAO populations are the key NO<sub>2</sub><sup>-</sup> reducers, while GAOs are the key NO reducers.  
458 Such metabolic segregation may be beneficial in eliminating the accumulation of the toxic NO  
459 intermediate. This is analogous to the prediction that the segregation of the NO<sub>3</sub><sup>-</sup> and NO<sub>2</sub><sup>-</sup>  
460 reduction reduces the accumulation of NO<sub>2</sub><sup>-</sup> (Lilja and Johnson, 2016), which can be inhibitory  
461 to many denitrifiers at high concentrations. It should be noted that the potential segregation of  
462 NO<sub>2</sub><sup>-</sup> and NO reduction in the DPAO-enriched consortia that is our focus is based solely on the  
463 gene transcriptional patterns mapped to PAO and GAO MAGs. Further wet-lab experiments are  
464 necessary to conclusively demonstrate NO crossfeeding, and more research is needed to identify  
465 how common such segregation might be in denitrifying communities. The efforts of Lilja and

466 Johnson (Lilja and Johnson, 2016) with model dual species communities of denitrifiers offers an  
467 appealing route to directly test the fitness benefits of metabolic segregation at different steps in  
468 the denitrification pathway.

469

#### 470 *Mechanisms for N<sub>2</sub>O production by the denitrifying EBPR consortia*

471 Our results suggest a strong role for differential denitrification gene expression in both  
472 *Accumulibacter* populations and in the overall microbial community in controlling N<sub>2</sub>O  
473 accumulation in DPAO-enriched consortia. Unlike *norB* gene transcripts (~93% of which were  
474 expressed by the one GAO population), >70% of both the nitrite reductase gene (*nirS*) transcripts  
475 and the nitrous oxide reductase gene (*nosZ*) transcripts were associated with the *Accumulibacter*  
476 populations. However, the RNA-RPKM values of the *Accumulibacter nirS* genes were ~7 times  
477 higher than that of the *Accumulibacter nosZ* genes. Considering that NOS is responsible for the  
478 conversion of N<sub>2</sub>O to N<sub>2</sub>, such differential expression of the *nirS* gene versus the *nosZ* gene in  
479 the *Accumulibacter* populations may limit N<sub>2</sub>O conversion to N<sub>2</sub> and induce the observed N<sub>2</sub>O  
480 accumulation in this and other denitrifying EBPR bioreactors. Such imbalance between *nirS* and  
481 *nosZ* gene abundance and expression has also been noted as potential factor leading to N<sub>2</sub>O  
482 generation by non-PAO denitrifiers in soils and other environments (Philippot et al., 2009;  
483 Schreiber et al., 2012). Another factor that may affect N<sub>2</sub>O accumulation is inter-enzyme  
484 competition between the nitrite reductase and the nitrous oxide reductase in the *Accumulibacter*  
485 populations. Competition for electrons has been demonstrated among N-reductases, which would  
486 cause the accumulation of denitrification intermediates (Pan et al., 2013). If the nitrite reductase  
487 has priority over (e.g. outcompetes) nitrous oxide reductase in the utilization of either reducing

488 equivalents or the building blocks for enzyme synthesis, the N<sub>2</sub>O reducing capacity by the host  
489 *Accumulibacter* populations may be limited when NO<sub>2</sub><sup>-</sup> is available as the electron acceptor.

490

491 *Potential cooperation and competition patterns between PAOs, GAOs, and flanking populations*  
492 *in the denitrifying EBPR biomass*

493 *Accumulibacter*-affiliated PAOs and *Competibacter*-affiliated GAOs are two key functional  
494 groups in EBPR bioprocesses (McIlroy et al., 2014). We previously recovered a novel  
495 *Accumulibacter* MAG in clade IC (Gao et al., 2019) from this denitrifying EBPR consortium. In  
496 this study, we recovered a novel *Accumulibacter* MAG associated with an entirely new clade  
497 (proposed as clade IF), as well as novel GAO MAG. The denitrifying EBPR consortia in this  
498 study was characterized by the unique feature of significant N<sub>2</sub>O accumulation and highly  
499 efficient P-uptake over NO<sub>2</sub><sup>-</sup>. Recovery of these novel GAO and PAO MAGs is important in  
500 expanding our understanding of novel genotype features corresponding to the unusual  
501 phenotypes observed in this and other denitrifying EBPR processes (Camejo et al., 2016). In  
502 particular, while the proposed *Accumulibacter* clade IF has not been previously documented in  
503 these types of bioprocesses, its exceptionally high transcriptional activity under anoxic  
504 conditions and the unusually high P uptake over NO<sub>2</sub><sup>-</sup> compared to O<sub>2</sub> (Table 1) suggest that this  
505 clade may be well suited to denitrifying biological P removal. Importantly, differential  
506 expression of *nirS* versus *nosZ* also suggest that this clade may be linked to excess N<sub>2</sub>O  
507 emissions.

508 We documented a significantly higher transcriptional activity for *Accumulibacter*-  
509 associated *prpE* over *Competibacter*-associated *prpE*, suggesting an advantage for  
510 *Accumulibacter* to compete for propionate over GAOs as electron donor. This is in accordance

511 with previous studies based on process performance monitoring that suggest that propionate  
512 favors PAOs over GAOs (Oehmen et al., 2005). The potentially higher fitness of Accumulibacter  
513 over Competibacter in utilizing propionate may explain the higher P-removal per C-uptake as  
514 well as the better P-removal efficiency when propionate was applied as the primary carbon  
515 source (Table 1). Indeed, the presence of an active GAO1 population did not outcompete the  
516 Accumulibacter populations in the utilization of either acetate or propionate; based on *ackA*, *acs*,  
517 and *prpE* gene transcripts, the three Accumulibacter populations accounted for 80-90% gene  
518 expression related to activation of these primary carbon sources.

519 As the utilization of the primary carbon sources was limited for the non-PAO and non-  
520 GAO genomes based on acetate and propionate activation gene presence and expression levels  
521 (>95% of which mapped to Accumulibacter and Competibacter MAGs), the breakdown of EPS  
522 produced by Accumulibacter and endogenous metabolism may support their growth and  
523 replication. Utilization of the EPS to support the growth of the flanking heterotrophic  
524 populations has also been hypothesized in anammox granules (Lawson et al., 2017). Based on  
525 genomic content and patterns of gene expression, we hypothesize that the two highly active non-  
526 PAO and non-GAO flanking populations, CH7 and PR6, may use extracellular substances  
527 including carbohydrates in EPS excreted by Accumulibacter populations, extracellular proteins,  
528 and extracellular serine as their primary carbon sources. Amino acids and cofactors cross-feeding  
529 may also occur between the Accumulibacter populations and the two flanking populations of  
530 CH7 and PR6 (see Figure S5). CH7 affiliates with the Chloroflexota phylum (Chloroflexi  
531 phylum in NCBI taxonomy). Members of this phylum have previously been suggested to be  
532 active as scavengers of organic compounds in other engineered systems, including anammox  
533 reactors (Kindaichi et al., 2012) and activated sludge (Kragelund et al., 2007).



534 In addition to their putative role in consuming endogenous organic carbon,  
535 metatranscriptomic data suggests that the flanking non-PAO PR6 (Gammaproteobacteria) may  
536 also play an important role in aggregate (granule) formation. Granules were formed in this  
537 DPAO consortia without intentional selection. Type IV pili are recognized as an important cell  
538 surface structure that mediate or regulate the bioprocesses involved in establishing/maintaining  
539 the biofilms and microbial aggregates (Maldarelli et al., 2016). Genes *PilQ/PilYI* involved in  
540 Type IV pilus synthesis were among the most highly expressed genes in PR6. 33% of the mRNA  
541 reads mapped to *PilQ/PilYI* associated with PR6, and this ratio was even higher than those in the  
542 range of 14%-27% *PilQ/PilYI* mRNA transcripts associated with the three *Accumulibacter* PAO  
543 populations. Consistent with the hypothesis that PR6 may support granule formation or structure,  
544 genus *Pseudoxanthomonas*, to which PR6 affiliates, has previously been identified as highly  
545 abundant in aerobic granular sludge (Weissbrodt et al., 2012; Leventhal et al., 2018).

546

## 547 **Materials and Methods**

### 548 *Bioreactor operation*

549 A 14L lab-scale denitrifying Enhanced Biological Phosphorus Removal (EBPR) sequencing  
550 batch reactor with 12 L working volume was operated continuously with synthetic municipal  
551 wastewater for 3 years to select for high denitrifying PAO (DPAO) activity (Gao et al., 2017).  
552 The reactor was inoculated with activated sludge from an EBPR process at the Stickney Water  
553 Reclamation Plant (Chicago, IL), and operated with an HRT of 12 hours under cyclic anaerobic  
554 and anoxic conditions with a short aerobic polishing step. No biomass was intentionally wasted  
555 during the operation. Briefly, during the anaerobic period (90 min), the primary carbon source

556 was switched between acetate and propionate (120-150 mg-COD/L) every two SBR cycles. In  
557 the subsequent anoxic phase (150 min), high  $\text{NO}_2^-$  feed (40-50 mg-N/L) intended to mimic  
558 effluent from an upstream nitrification reactor was dosed as the terminal electron acceptor for  
559 denitrifying phosphate uptake. A 60-min aerobic polishing period was added after the anoxic  
560 phase to improve P removal. The initial P concentration was between 5-10 mg  $\text{PO}_4^{3-}$ -P/L.  
561 Detailed reactor operation conditions and performance were described previously (Gao et al.,  
562 2017). While the SBR was operated for retention of suspended growth (floccular) biomass, over  
563 the course of long-term reactor operation granule formation was observed. During the period of  
564 biomass collection for this study, both granules and floccular biomass were present in the  
565 reactor.

566

#### 567 *Sample collection*

568 To profile gene expression in typical denitrifying EBPR cycles using either acetate or propionate  
569 as the primary carbon source, biomass samples were collected every 15 min over complete SBR  
570 cycles for RNA extraction and key metabolites profiling. For each carbon source, sampling was  
571 conducted in duplicate cycles. Bulk biomass (2 ml) was collected for each time point in  
572 microcentrifuge tubes, and preserved using *RNAlater* Stabilization Solution (Invitrogen, USA).  
573 Samples were centrifuged, supernatant removed, and the pellet submerged in 1 ml of *RNAlater*  
574 solution overnight. *RNAlater* solution was then removed and cell pellets were flash frozen in  
575 liquid nitrogen and stored in  $-80^\circ\text{C}$  freezer prior to RNA extraction. To recover metagenome  
576 assembled genomes (for mapping of metatranscriptome sequencing data) and facilitate  
577 evaluation of population segregation between aggregate size classes, three biomass samples  
578 including one for the bulk biomass and two samples representing different biomass size fractions

579 were collected from the reactor for DNA extraction during the period when gene expression  
580 studies were conducted. Because granulation was observed during the long-term reactor  
581 operation, aggregate size fraction cutoffs were chosen based on particle size analysis of the  
582 biomass (Figure S8). Biomass was then separated based on particle size (<350µm, corresponding  
583 to approximately 50% of the total volume, and ≥350µm) by sieving, as described previously  
584 (Gao et al., 2019). Each biomass sample was centrifuged to remove supernatant and stored at -  
585 80°C prior to DNA extraction.

586

#### 587 *Chemical analyses*

588 Chemical analyses were performed at the same time points used for RNA sample archiving. To  
589 monitor the EBPR cycle, NO<sub>2</sub><sup>-</sup> and phosphate (PO<sub>4</sub><sup>3-</sup>) were measured with an automated  
590 Continuous Flow Analyzer (CFA) (Skalar, Netherlands) based on standard colorimetric methods  
591 (APHA, 1998). N<sub>2</sub>O was monitored using an N<sub>2</sub>O-Wastewater sensor (Unisense, Denmark)  
592 continuously during the operation. Acetate and propionate were measured using a GC-FID  
593 (Thermo Fisher Scientific, USA) following previously described methods (Gao et al., 2017).  
594 MLSS and MLVSS were measured using standard methods (APHA, 1998).

595

#### 596 *Nucleic Acid Extraction and Metagenomic and Metatranscriptomic Sequencing*

597 Genomic DNA was extracted from each biomass sample in duplicate using the FastDNA SPIN  
598 Kit for soil (MP Biomedicals, USA), according to the manufacturer's protocols. Total RNA was  
599 extracted from each time point using the MagAttract PowerMicrobiome RNA kit (Qiagen, USA).  
600 Extracted RNA was quality-checked using agarose gel electrophoresis and Synergy HTX Multi-

601 Mode Reader (BioTek, USA). Samples were selected for metatranscriptomic sequencing from  
602 each phase of operation (anaerobic: 30 minutes, anoxic: 150 minutes, aerobic: 270 minutes)  
603 based on RT-qPCR results of *nirS* and *nosZ* in 15 minute increments (see Table S2 in the  
604 supporting information for details). The stranded DNA-seq and mRNA-seq was conducted in the  
605 Northwestern University NUSeq Core Facility. Briefly, the DNA and RNA concentrations were  
606 determined with a Qubit fluorometer. Total RNA samples were also checked for fragment sizing  
607 using an Agilent Bioanalyzer 2100. The Illumina TruSeq Stranded Total RNA Library  
608 Preparation Kit was used to prepare sequencing libraries from 1 ug of total RNA samples. This  
609 procedure includes rRNA depletion with Ribo-Zero Bacterial rRNA Removal Kit, cDNA  
610 synthesis, 3' end adenylation, adapter ligation, library PCR amplification and validation. An  
611 Illumina HiSeq 4000 Sequencer was used to generate paired-end 150 bp reads from the libraries,  
612 with an average insert size of 650 bp. Raw paired-end reads were initially filtered, and adapters  
613 trimmed using cutadapt v1.13 to remove low-quality bases and adapters from both ends and to  
614 discard reads based on maximum error rate of 0.1 and minimum length of 20 bp (Martin, 2011).

615

#### 616 *Metagenomic Assembly, Genome Binning, Annotation, and Metabolic Reconstruction*

617 Clean DNA paired-end reads from each sample were assembled separately as well as co-  
618 assembled using the *de novo* assembler IDBA-UD using multiple kmer values from 20 to 80 and  
619 minimal contig length of 500 bp (Peng et al., 2012). The quality of assembled contigs with  
620 different kmers was checked by QUAST (Gurevich et al., 2013). Co-assembled contigs resulted  
621 in a maximum N50 and were therefore used for downstream analysis. Coverage across all  
622 contigs was calculated by mapping raw reads from each sample against the assembled contigs  
623 using Bowtie2 with default parameters (Langmead and Salzberg, 2012). As is summarized in

624 Table S3, shotgun metagenomic sequencing all three samples generated a total of 51.6 Gbp of  
625 raw sequencing reads and 49.4 Gbp of clean data after quality-filtering. Co-assembling all the  
626 samples yielded a total of 290,166 contigs with an N50 of 4,145. On average,  $82.6 \pm 1.3\%$  of the  
627 clean reads from each DNA sequencing sample and  $75.2 \pm 1.0\%$  of the filtered mRNA sequencing  
628 samples were aligned to the co-assembled contigs, indicating that the co-assembled contigs  
629 captured the majority of the metagenomic and metatranscriptomic sequencing reads. Open  
630 reading frame (ORF) calling was performed using Prodigal v2.6.2 (Hyatt et al., 2012). To extract  
631 draft metagenome assembled genomes from the co-assembled contigs, genome binning was then  
632 performed with MetaBAT under the ‘superspecific’ mode with the resulting mapping files,  
633 which yielded 32 MAGs. The quality of each draft genome was checked using CheckM v1.0.7  
634 based on 111 essential single-copy genes (Parks et al., 2015). High quality draft genomes with  
635 completeness greater than 85% and contamination less than 5% were retained for downstream  
636 analysis. Draft genome annotation was performed using Prokka v1.12 (Seemann, 2014) and  
637 RAST v0.0.12 (Meyer et al., 2008) in KBase. Genes involved in key metabolic pathways of  
638 interest including carbon, nitrogen, phosphorus metabolism, and electron transport were  
639 validated manually with the assistance of the BioCyc pathway database and KEGG pathway  
640 (Kanehisa and Goto, 2000; Caspi et al., 2012).

641

#### 642 *Phylogenetic Analysis of Metagenomic Assembled Genomes*

643 The taxonomic affiliation of each MAG was inferred using GTDB-Tk v0.1.3 under  
644 ‘classification’ mode, based on 120 ubiquitous single-copy protein sequences (Parks et al., 2018).  
645 To generate a maximum likelihood tree, marker genes from 251 genomes that are closely related  
646 to the MAGs in the GTDB reference database were extracted. MAFFT was used to realign the

647 concatenated single-copy protein sequences, and RAxML v8.2.10 was then applied to generate a  
648 maximum likelihood tree with the automatic protein model assignment algorithm  
649 (PROTGAMMAAUTO) and 100 rapid bootstraps (Stamatakis, 2014).

650

#### 651 *ppk1* clone library construction and sequencing

652 To characterize clade-level community structure of *Accumulibacter*, a 1123 bp fragment of the  
653 *Accumulibacter*-specific *ppk1* gene was PCR amplified from the DNA extracts of bulk biomass  
654 using primers ACC-*ppk1*-254f and ACC-*ppk1*-1376r (McMahon et al., 2007), as previously  
655 described (Gao et al., 2017). Triplicate PCR products were pooled and purified via gel  
656 electrophoresis using the PureLink Quick Gel Extraction Kit (ThermoFisher). The purified PCR  
657 products were cloned using the TOPO® TA cloning® kits (Invitrogen), as per the  
658 manufacturer's protocol. Among the white colonies produced, 35 colonies were picked and  
659 cultured overnight in LB medium containing 50 µg/ml ampicillin. The plasmids were isolated  
660 using the PureLink Quick Plasmid Miniprep Kit (ThermoFisher) and sequenced by ATGC Inc.  
661 (Wheeling, IL) with an ABI 3730 DNA analyzer (Applied Biosystems, USA).

662

#### 663 *ppk1* gene screening and phylogenetic analysis

664 To identify *ppk1* genes in assembled metagenomic contigs, a BLAST+ search was performed  
665 using ORFs predicted from co-assembled contigs as a query, against 781 reference  
666 *Accumulibacter*-associated *ppk1* sequences based on an e-value cut-off of  $10^{-5}$  (Camacho et al.,  
667 2009). 13 unique *ppk1* genes were annotated from the metagenomic dataset. The micro-diversity  
668 of these 13 assembled *ppk1* genes and the 35 *ppk1* gene clones were evaluated via phylogenetic

669 analysis. 952 *ppk1* gene sequences downloaded from NCBI were applied as reference *ppk1*  
670 sequences. The *ppk1* genes were aligned through MAFFT (Kato and Standley, 2013) over a  
671 consensus region of 1007 bp. Maximum-likelihood phylogenetic trees were constructed with  
672 RAxML v8.2.10 with the automatic protein model assignment algorithm (PROTGAMMAAUTO)  
673 and 100 rapid bootstraps (Stamatakis, 2014). Visualization of the phylogenetic tree was through  
674 the iTOL platform (Letunic and Bork, 2016).

675

#### 676 *Metatranscriptomic analysis*

677 Ribosomal rRNA sequences in the clean metatranscriptomic reads were identified by aligning  
678 the clean reads against the SILVA (SSURef and LSURef) database release 128 using BLAST+  
679 (Quast et al., 2013; Yilmaz et al., 2014). Sequences with alignments to the rRNA database in  
680 SILVA that had an e-value < 1e-9 were assumed to be rRNA and discarded from further analyses.  
681 The resulting non-rRNA (mRNA) reads were mapped to all co-assembled metagenomic contigs  
682 using Bowtie2 with the end-by-end mode (Langmead and Salzberg, 2012). To increase the  
683 mapping sensitivity, the following parameters were used when applying Bowtie2: the length of  
684 the seed substrings to align=25, maximum mismatch penalties=10, and minimum mismatch  
685 penalties=5.

686 To profile gene expression across the MAGs, htseq-count v0.6.1 was used to calculate the  
687 mRNA read counts mapped to each predicted ORF with the ‘intersection strict’ parameter  
688 (Anders et al., 2015). mRNA-RPKM values of each ORF were then calculated by normalizing  
689 the mapped mRNA read counts by the sequencing depth and ORF length. Pathway expression  
690 levels were calculated based on averaging the RPKM values for each gene involved. To compare

691 gene expression dynamics under different redox conditions (anaerobic/anoxic/aerobic), the gene  
692 expression change for metabolic pathways or functional genes was determined by normalizing  
693 the RPKM values under the anoxic or aerobic conditions to the RPKM values under the  
694 anaerobic conditions (mRNA/mRNA ratio).

#### 695 *Carbohydrate hydrolase and membrane transport proteins identification*

696 Carbohydrate hydrolases and membrane transport proteins were identified in each genome by  
697 BLASTP searches against the CAZy (Lombard et al., 2014) and TCDB (Saier et al., 2016)  
698 databases. CELLO v2.5 was used to predict the subcellular location of identified carbohydrate  
699 hydrolases using support vector machines based on n-peptide composition (Yu et al., 2004).

700

#### 701 *Data availability*

702 Raw metagenome DNA (3 datasets in total) and metatranscriptome RNA (6 datasets in total)  
703 sequencing data are available in the NCBI Sequence Read Archive (SRA) database under the  
704 Bioproject accession number of PRJNA576469. GeneBank accession numbers of the 35 *ppk1*  
705 gene clone sequences are MN551751-MN551785. Accession numbers of the 32 MAGs  
706 recovered in this study are SAMN12995720-SAMN12995751.



## Figures and Tables

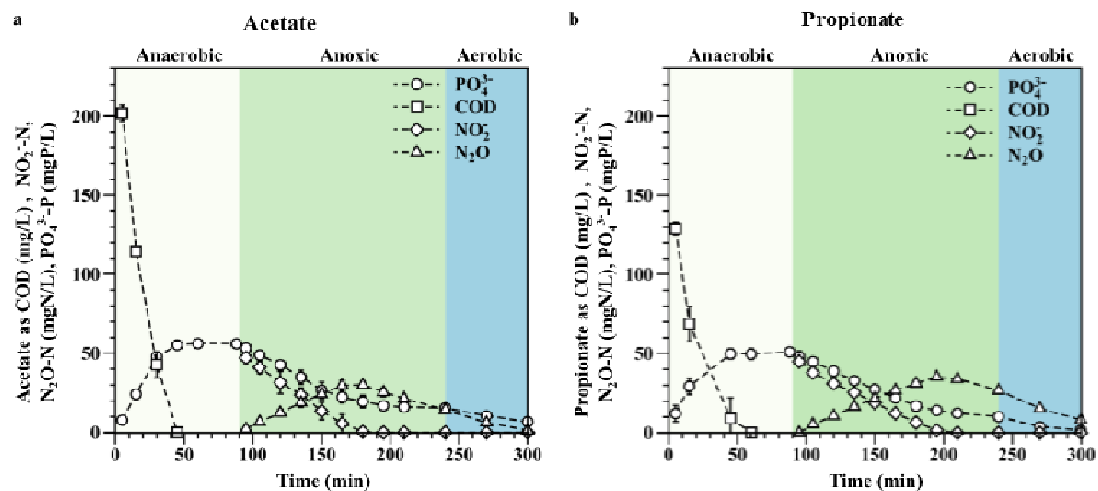

**Figure 1.** Within-cycle profiles of key C, N and P constituents (acetate/propionate as COD,  $\text{NO}_2^-$ , dissolved  $\text{N}_2\text{O}$  and  $\text{PO}_4^{3-}$ ) with (a) acetate and (b) propionate feed during RNA sampling. Error bars are based on duplicate measurements.

**Table 1.** N and P removal rates and efficiencies during anoxic and aerobic phases in two typical SBR cycles with different external electron donors (acetate and propionate). Averages and standard deviations are across two cycles for each external electron donor.

|            | Specific anoxic P uptake rate<br>(PO <sub>4</sub> <sup>3-</sup> as P)<br>(mg/L•h•MLVV S) <sup>a</sup> | Specific aerobic P uptake rate<br>(PO <sub>4</sub> <sup>3-</sup> as P)<br>(mg/L•h•MLVSS) <sup>a</sup> | Specific NO <sub>2</sub> <sup>-</sup> reduction rate<br>(NO <sub>2</sub> <sup>-</sup> as N)<br>(mg/L•h•MLVSS) <sup>a</sup> | Specific COD removal rate<br>(COD)<br>(mg/L•h•MLVSS) | P removal (%) | P-release/<br>C-uptake during anaerobic phase<br>(mole/mole) | N <sub>2</sub> O production (%) <sup>b</sup> |
|------------|-------------------------------------------------------------------------------------------------------|-------------------------------------------------------------------------------------------------------|----------------------------------------------------------------------------------------------------------------------------|------------------------------------------------------|---------------|--------------------------------------------------------------|----------------------------------------------|
| Acetate    | 6.6 ± 2.0                                                                                             | 1.8 ± 0.1                                                                                             | 6.8 ± 0.2                                                                                                                  | 71.8 ± 14.0                                          | 13.3 ± 12.9   | 0.2 ± 0.0                                                    | 67.7 ± 2.8                                   |
| Propionate | 6.7 ± 0.5                                                                                             | 2.6 ± 0.1                                                                                             | 7.5 ± 0.1                                                                                                                  | 68.4 ± 3.4                                           | 88.2 ± 8.7    | 0.3 ± 0.0                                                    | 80.0 ± 1.5                                   |

- a. NO<sub>2</sub><sup>-</sup> reduction and anoxic/aerobic PO<sub>4</sub><sup>3-</sup> removal rates were calculated based on the linear regression of chemical profiles.  
 b. Values refer to percent of removed NO<sub>2</sub><sup>-</sup>-N, based on dissolved N<sub>2</sub>O.



**Figure 2.** Maximum likelihood phylogenetic tree of *Accumulibacter ppk1* gene sequences (1007 bp fragment) identified in this denitrifying EBPR consortia. Clades IA, IB, IC, ID, and IE are labeled in grey, blue, brown, green and yellow, respectively; and the proposed clade IF is labeled in dark blue. The tree includes *ppk1* genes extracted from 4 available Type 1 genomes and 3 draft genomes from this reactor (sequence names in red; ACC-IF obtained in the study, ACC-IC and ACC-IA from our previous work (Gao et al., 2019)); *ppk1* gene sequences obtained via cloning and sequencing (in magenta); *ppk1* gene sequences identified in metagenomic contigs (in pink); and *ppk1* reference gene sequences from NCBI (in black). The *Horocycles tenuis ppk1* gene (AF502199.1) was applied as the outgroup. Type II *ppk1* gene cluster is collapsed in this figure as no *ppk1* gene identified in this DPAO consortia was of Type II, and some sub-clusters of the type I *ppk1* genes were also collapsed to support a clearer visualization of the phylogeny. NCBI accession numbers for *Accumulibacter* draft genomes BA-93, BA-92, HKU1 are GCA\_000585075.1, GCA\_000585055.1, GCA\_000987395.1. The UW-3 genome was downloaded from JGI Integrated Microbial Genomes (IMG genome ID 2687453699). The accession number of the two *Accumulibacter* draft genomes Acc-IA and Acc-IC previously reconstructed from the same reactor were PHDR00000000 and PDHS00000000.

1 **Table 2.** Characteristics of all MAGs obtained in this study, including one novel *Accumulibacter* genome (Acc-1F), a novel *Competibacter* genome (GAO1), and  
 2 30 non-PAO or GAO flanking genomes. The taxonomy affiliation of each MAG is in accord with the Genome Taxonomy Database (GTDB).

| Bin id | Taxonomy                                                                     | Compl. (%) | Contamin. (%) | Genome size | Contig number | Gene number | GC  | N50 (bp) |
|--------|------------------------------------------------------------------------------|------------|---------------|-------------|---------------|-------------|-----|----------|
| BA1    | Bacteroidota ;Bacteroidia;Chitinophagales;Chitinophagaceae                   | 91.2       | 0.5           | 3.5E+06     | 250           | 3137        | 0.5 | 20180    |
| BA2    | Bacteroidota;Bacteroidia;Chitinophagales;Chitinophagaceae                    | 95.1       | 0.1           | 3.4E+06     | 44            | 2894        | 0.5 | 11714    |
| BA3    | Bacteroidota;Bacteroidia;Chitinophagales;Saprospiraceae                      | 99.0       | 2.2           | 5.2E+06     | 391           | 4084        | 0.5 | 20641    |
| BA4    | Bacteroidota;Bacteroidia;Flavobacteriales                                    | 97.1       | 0.0           | 2.7E+06     | 62            | 2327        | 0.4 | 9784     |
| BA5    | Bacteroidota;Bacteroidia;Flavobacteriales;Weeksellaceae;<br>Chryseobacterium | 86.5       | 2.0           | 2.2E+06     | 447           | 2125        | 0.4 | 6125     |
| BA6    | Bacteroidota;Ignavibacteria                                                  | 87.3       | 1.0           | 3.8E+06     | 255           | 3435        | 0.4 | 2341     |
| BA7    | Bacteroidota;Ignavibacteria                                                  | 94.3       | 1.2           | 3.1E+06     | 102           | 2679        | 0.3 | 5493     |
| BA8    | Bacteroidota;Ignavibacteria                                                  | 88.8       | 2.2           | 3.6E+06     | 283           | 3411        | 0.4 | 1745     |
| BA9    | Bacteroidota;Ignavibacteria;Ignavibacteriales;Ignavibacteriaceae             | 94.7       | 7.4           | 3.8E+06     | 480           | 3158        | 0.4 | 1088     |
| BA10   | Bacteroidota;Kapabacteria;Kapabacteriales                                    | 92.8       | 1.1           | 3.2E+06     | 477           | 2799        | 0.4 | 8796     |
| BA11   | Bacteroidota;Kapabacteria;Kapabacteriales;Kapabacteriaceae                   | 94.8       | 0.6           | 2.4E+06     | 112           | 2032        | 0.5 | 37313    |
| BA12   | Bacteroidota;Rhodothermia;Rhodothermales                                     | 97.3       | 2.0           | 3.0E+06     | 219           | 2732        | 0.7 | 21737    |
| CH1    | Chloroflexota ;Anaerolineae                                                  | 91.8       | 1.8           | 6.4E+06     | 937           | 6184        | 0.6 | 9487     |

|        |                                                                                            |      |     |         |      |      |     |       |
|--------|--------------------------------------------------------------------------------------------|------|-----|---------|------|------|-----|-------|
| CH2    | Chloroflexota;Anaerolineae                                                                 | 97.4 | 2.0 | 5.3E+06 | 352  | 4621 | 0.6 | 22736 |
| CH3    | Chloroflexota;Anaerolineae                                                                 | 90.6 | 1.1 | 4.9E+06 | 864  | 4352 | 0.7 | 7452  |
| CH4    | Chloroflexota;Anaerolineae                                                                 | 91.7 | 0.2 | 3.9E+06 | 269  | 3431 | 0.5 | 20919 |
| CH5    | Chloroflexota;Anaerolineae;Caldilineales;Caldilineaceae;Caldilinea                         | 95.5 | 0.0 | 6.0E+06 | 482  | 5082 | 0.6 | 20958 |
| CH6    | Chloroflexota;Anaerolineae;Promineofilales;Promineofilaceae                                | 94.6 | 4.9 | 6.9E+06 | 680  | 5861 | 0.6 | 14350 |
| CH7    | Chloroflexota;Anaerolineae;Promineofilales                                                 | 95.0 | 4.7 | 6.0E+06 | 1268 | 5902 | 0.6 | 9000  |
| MY1    | Myxococcota;Myxococcia;Myxococcales;Myxococcaceae                                          | 97.1 | 1.9 | 7.7E+06 | 448  | 6798 | 0.7 | 28780 |
| PR1    | Proteobacteria;Alphaproteobacteria;Micavibrionales;Micavibrionaceae                        | 95.0 | 1.3 | 2.1E+06 | 40   | 2021 | 0.5 | 69710 |
| PR2    | Proteobacteria;Alphaproteobacteria;Rhodobacterales;<br>Rhodobacteraceae                    | 97.1 | 1.2 | 4.4E+06 | 201  | 4187 | 0.7 | 37810 |
| PR3    | Proteobacteria;Gammaproteobacteria;Betaproteobacteriales;<br>Burkholderiaceae              | 95.7 | 2.1 | 3.7E+06 | 227  | 3560 | 0.7 | 30060 |
| PR4    | Proteobacteria;Gammaproteobacteria;Betaproteobacteriales;<br>Burkholderiaceae;Ideonella    | 94.8 | 1.9 | 4.5E+06 | 535  | 4575 | 0.7 | 12474 |
| Acc-1F | Proteobacteria;Gammaproteobacteria;Betaproteobacteriales;<br>Rhodocyclaceae;Accumulibacter | 96.5 | 4.3 | 4.4E+06 | 412  | 3973 | 0.7 | 19904 |
| GAO1   | Proteobacteria;Gammaproteobacteria;Competibacterales;                                      | 81.5 | 2.1 | 2.8E+06 | 400  | 2756 | 0.6 | 9990  |

|     |                                                                                                   |       |     |         |     |      |     |       |
|-----|---------------------------------------------------------------------------------------------------|-------|-----|---------|-----|------|-----|-------|
|     | Competibacteraceae                                                                                |       |     |         |     |      |     |       |
| PR5 | Proteobacteria; Gammaproteobacteria; Xanthomonadales;<br>Xanthomonadaceae; Luteimonas             | 90.9  | 1.4 | 2.2E+06 | 233 | 2285 | 0.7 | 15615 |
| PR6 | Proteobacteria; Gammaproteobacteria; Xanthomonadales;<br>Xanthomonadaceae; Pseudoxanthomonas      | 85.2  | 2.4 | 2.3E+06 | 498 | 2470 | 0.7 | 5718  |
| VE1 | Verrucomicrobiota; Verrucomicrobiae; Chthoniobacterales                                           | 100.0 | 2.0 | 3.2E+06 | 97  | 2966 | 0.6 | 5614  |
| VE2 | Verrucomicrobiota; Verrucomicrobiae; Chthoniobacterales;<br>Terrimicrobiaceae                     | 99.3  | 4.1 | 3.6E+06 | 178 | 3320 | 0.6 | 3110  |
| VE3 | Verrucomicrobiota; Verrucomicrobiae; Opitutales; Opitutaceae                                      | 96.6  | 4.4 | 5.4E+06 | 277 | 4409 | 0.7 | 3177  |
| VE4 | Verrucomicrobiota; Verrucomicrobiae; Verrucomicrobiales;<br>Verrucomicrobiaceae; Prostheco bacter | 96.7  | 1.8 | 7.7E+06 | 286 | 6222 | 0.6 | 4794  |

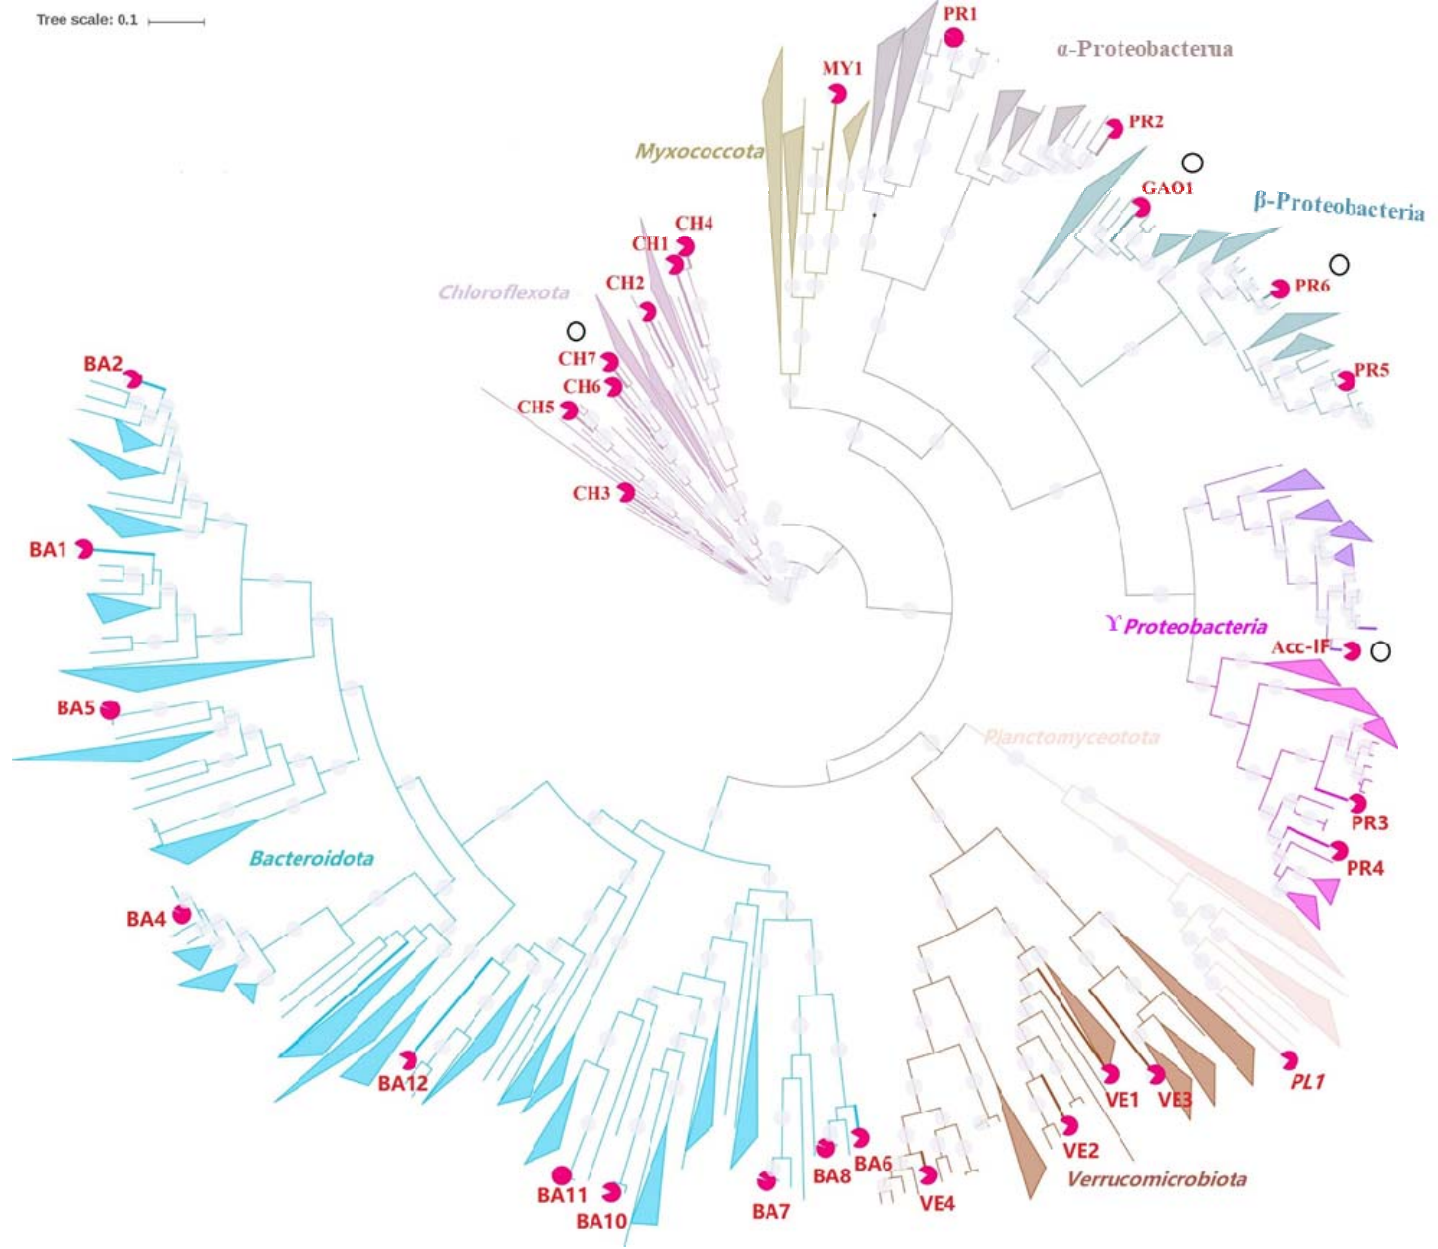



1

2 **Figure 3.** Maximum likelihood tree of the 32 MAGs and phylogenetically closely related reference genomes. Red circles at the end of  
3 branches represents the highest ANI between each MAG and the closest publicly available reference genome. The four MAGs of the  
4 highly abundant and active populations Acc-IF, GAO1, CH7 and PR6 are highlighted in this figure with a black circle positioned near  
5 their label names. Branches of the phylogenetic tree are colored according to the taxonomy affiliation. The tree was constructed using  
6 RAxML with 100 bootstraps based on a set of 120 concatenated universal single-copy proteins (Parks et al., 2018).

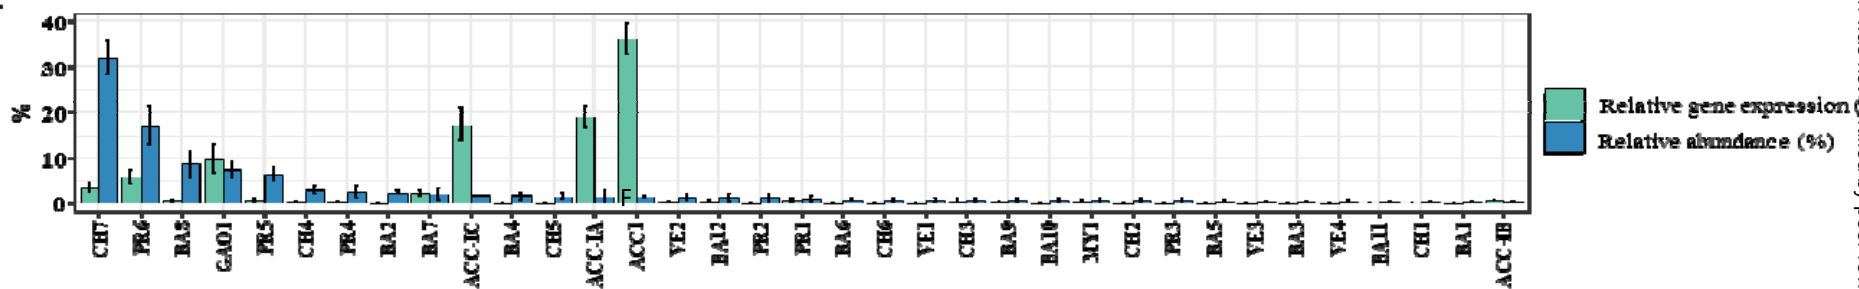

**Figure 4.** Relative abundance and relative gene expression of 32 MAGs recovered from the denitrifying EBPR reactor in this study and three *Accumulibacter* draft genomes (ACC-IA [Genbank accession number: PHDR000000000], ACC-IC [Genbank accession number: PDHS000000000] and ACC-IB [Genbank accession number: GCA\_000585055.1]). ACC-IC and IA MAGS (affiliated with *Accumulibacter* clades IC and IA) were recovered previously from this reactor (Gao et al., 2019). For comparison, ACC-IB (affiliated with *Accumulibacter* clade IB) was included due to identification of *ppk1* genes affiliated with clade IB from cloning and sequencing and from metagenome contig analysis. Draft genomes are ordered based on their genome abundance. Abundance and gene expression estimates are based on DNA-RPKM and RNA-RPKM values of DNA and mRNA reads mapped to each MAG, respectively. Values are averaged across all metagenomic and metatranscriptomic sequencing analyses, with standard deviation indicated by error bars.

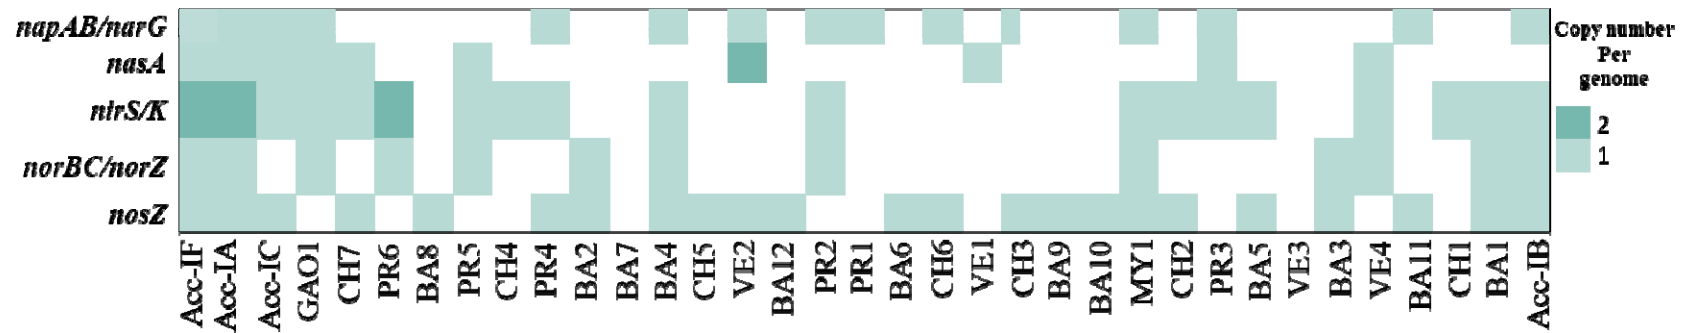

1  
2 **Figure 5.** Presence (Warnecke et al.) or absence (white) of core denitrification genes in 32 MAGs and the three reference  
3 Accumulibacter genomes. Acc-IF (recovered in this study), Acc-IA, Acc-IC (recovered previously from this system) and Acc-IB are  
4 Accumulibacter-affiliated MAGs; GAO1 is the one *Competibacter* affiliated MAG. *napAB*: periplasmic nitrate reductase; *narG*:  
5 nitrate reductase; *nasA*: nitrate transporter; *nirS/K*: nitrite reductase; *norBC*: respiratory nitric oxide reductase; *norZ*: nitric oxide  
6 reductase; *nosZ*: nitrous oxide reductase.

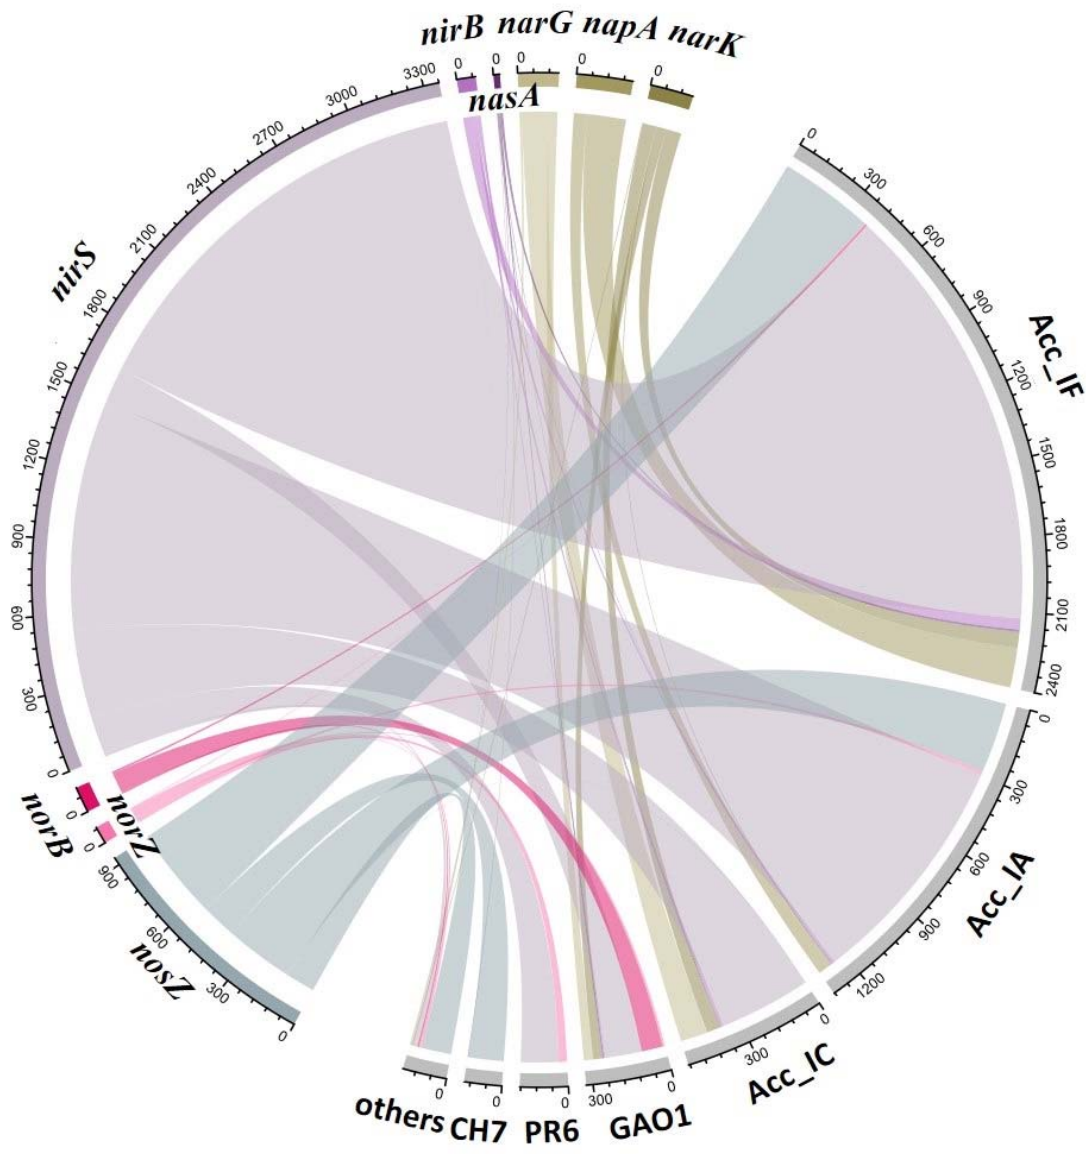

1 **Figure 6.** RNA-RPKM values of core denitrification genes encoding in the overall microbial community (left, organized by genes) and in the six MAGs of the  
2 highest expression activity (right, organized by genomes) under anoxic conditions. *nirK* expression levels were >100 fold lower than *nirS*, and are therefore not  
3 shown. Colors represent different genes, and the width of each ribbon represents the RNA-RPKM value averaged across the RNA-RPKM values of each gene  
4 under the anoxic period applying the two carbon sources: acetate and propionate.

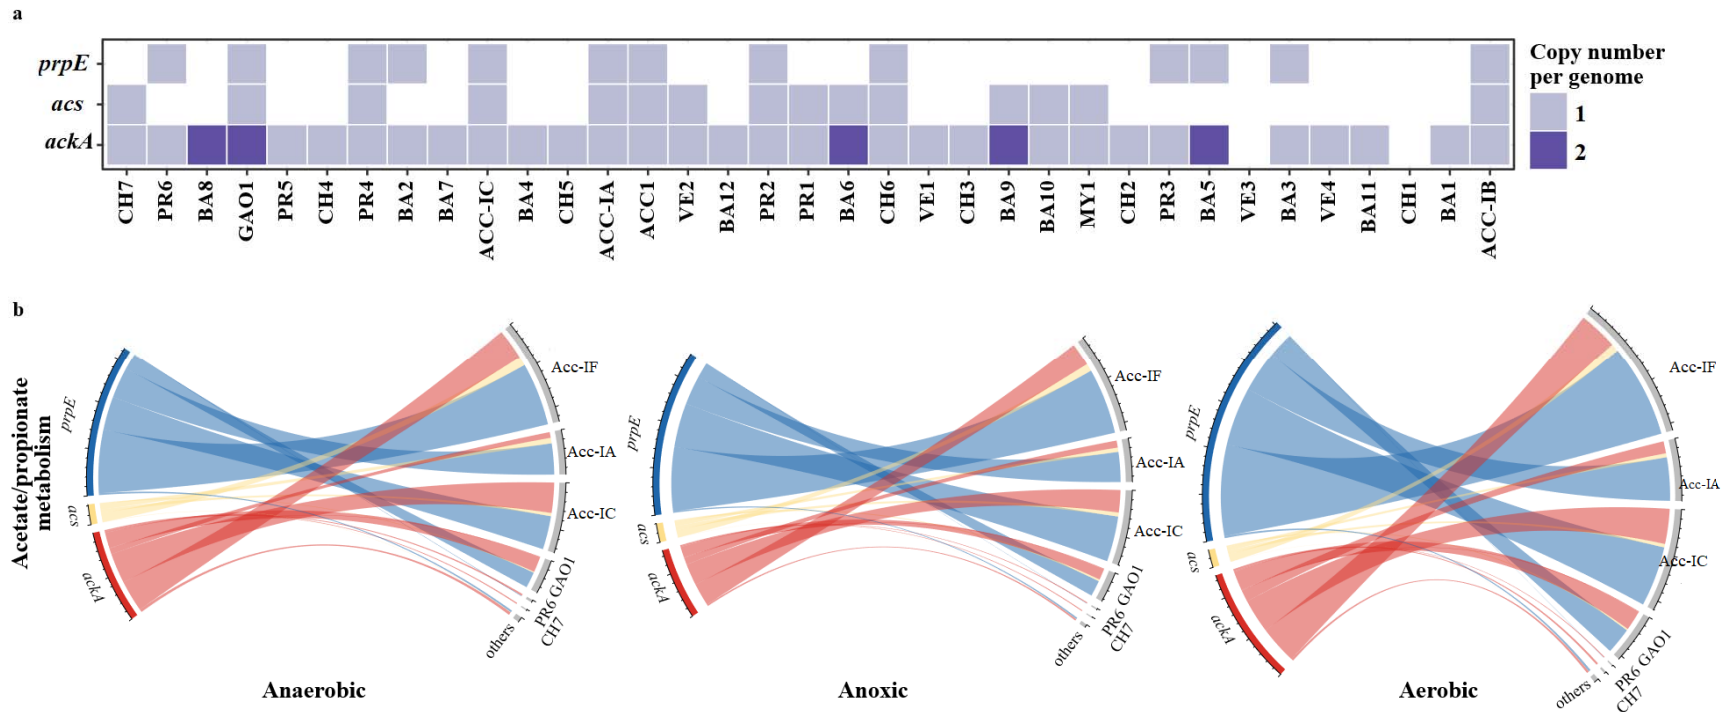

1  
 2 **Figure 7.** (a) The presence of key acetate/propionate activation genes (acetyl-coenzyme A synthase: *acs*, acetate kinase: *ackA*, and propionyl-CoA synthetase:  
 3 *prpE*) in the 32 MAGs and three reference *Accumulibacter* draft genomes. Bacterial draft genomes are ordered based on their genome abundance. (b) RPKM  
 4 values of selected acetate/ propionate activation genes in the overall microbial community (left, organized by genes) and in each MAG (right, organized by  
 5 genomes) under different redox conditions (anaerobic/anoxic/aerobic). Different colors represent different genes, and the width of the ribbons represent the  
 6 RNA-RPKM values averaged across the RNA-RPKM values of each gene applying the two carbon sources: acetate and propionate.

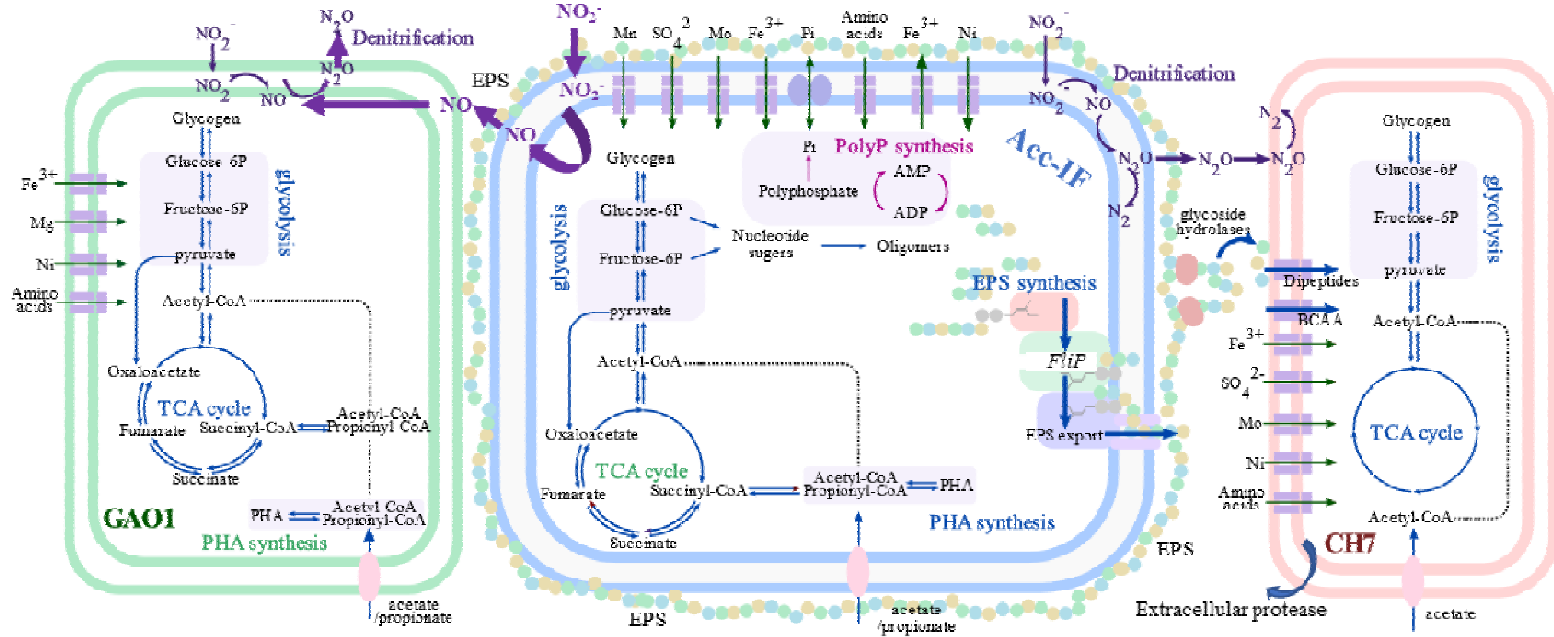

7  
 8 **Figure 8.** Conceptual schematic of predicted metabolic interactions between *Accumulibacter* associated PAOs (ACC1, middle),  
 9 *Competibacter* associated GAOs (GAO1, left) and CH7 (Haitjema et al.) in the denitrifying EBPR biomass, based on integrated  
 10 metagenomic and metatranscriptomic sequencing analyses. Carbon metabolic pathways, PolyP synthesis, denitrification is labelled in  
 11 blue, magenta and purple, respectively. Circles with different colors are used to represent EPS produced by *Accumulibacter*. Arrows  
 12 illustrating hypothesized substrate exchange between *Accumulibacter* and CH7 are bolded.

13

## 14 **References**

15

16 Albertsen, M., McIlroy, S.J., Stokholm-Bjerregaard, M., Karst, S.M., and Nielsen, P.H. (2016)  
17 "Candidatus Propionivibrio aalborgensis": A Novel Glycogen Accumulating Organism  
18 Abundant in Full-Scale Enhanced Biological Phosphorus Removal Plants. *Front Microbiol* **7**:  
19 1033.

20 Anantharaman, K., Brown, C.T., Hug, L.A., Sharon, I., Castelle, C.J., Probst, A.J. et al. (2016)  
21 Thousands of microbial genomes shed light on interconnected biogeochemical processes in an  
22 aquifer system. *Nat Commun* **7**: 13219.

23 Anders, S., Pyl, P.T., and Huber, W. (2015) HTSeq--a Python framework to work with high-  
24 throughput sequencing data. *Bioinformatics* **31**: 166-169.

25 APHA (1998) *Standard Methods for the Examination of Water and Wastewater, 20th ed.*  
26 Washington D.C., USA.

27 Barr, J.J., Dutilh, B.E., Skennerton, C.T., Fukushima, T., Hastie, M.L., Gorman, J.J. et al. (2016)  
28 Metagenomic and metaproteomic analyses of Accumulibacter phosphatis-enriched floccular and  
29 granular biofilm. *Environ Microbiol* **18**: 273-287.

30 Camacho, C., Coulouris, G., Avagyan, V., Ma, N., Papadopoulos, J., Bealer, K., and Madden,  
31 T.L. (2009) BLAST+: architecture and applications. *BMC Bioinformatics* **10**: 421.

32 Comeau, Y., Hall, K.J., Hancock, R.E.W., Oldham, W. K. (1986) Biochemical model for  
33 enhanced biological phosphorus removal. *Water Res* **20**: 1511-1521.

34 Camejo, P.Y., Oyserman, B.O., McMahon D., J., Noguera D.R.. (2016) Integrated Omic  
35 Analyses Provide Evidence that a "Candidatus Accumulibacter phosphatis" Strain Performs  
36 Denitrification under Microaerobic Conditions. *Msystems* **102**: 125-137.  
37 DOI: 10.1128/mSystems.00193-18

38 Caspi, R., Altman, T., Dreher, K., Fulcher, C.A., Subhraveti, P., Keseler, I.M. et al. (2012) The  
39 MetaCyc database of metabolic pathways and enzymes and the BioCyc collection of  
40 pathway/genome databases. *Nucleic Acids Res* **40**: D742-753.

41 Crocetti, G.R., Banfield, J.F., Keller, J., Bond, P.L., Blackall, L.L. (2002) Glycogen-  
42 accumulating organisms in laboratory-scale and full-scale wastewater treatment processes.  
43 *Microbiology* **148**: 3353-3364.



- 44 Flowers, J.J., He, S., Malfatti, S., del Rio, T.G., Tringe, S.G., Hugenholtz, P., and McMahon,  
45 K.D. (2013) Comparative genomics of two 'Candidatus Accumulibacter' clades performing  
46 biological phosphorus removal. *ISME J* **7**: 2301-2314.
- 47 Gao, H., Scherson, Y.D., and Wells, G.F. (2014) Towards energy neutral wastewater treatment:  
48 methodology and state of the art. *Environ Sci Process Impacts* **16**: 1223-1246.
- 49 Gao, H., Mao, Y., Zhao, X., Liu, W.T., Zhang, T., and Wells, G. (2019) Genome-centric  
50 metagenomics resolves microbial diversity and prevalent truncated denitrification pathways in a  
51 denitrifying PAO-enriched bioprocess. *Water Res* **155**: 275-287.
- 52 Gao, H., Liu, M., Griffin, J.S., Xu, L., Xiang, D., Scherson, Y.D. et al. (2017) Complete Nutrient  
53 Removal Coupled to Nitrous Oxide Production as a Bioenergy Source by Denitrifying  
54 Polyphosphate-Accumulating Organisms. *Environ Sci Technol* **51**: 4531-4540.
- 55 Ge, S., Peng, Y., Wang, S., Lu, C., Cao, X., and Zhu, Y. (2012) Nitrite accumulation under  
56 constant temperature in anoxic denitrification process: The effects of carbon sources and  
57 COD/NO(3)-N. *Bioresour Technol* **114**: 137-143.
- 58 Graf, D.R., Jones, C.M., and Hallin, S. (2014) Intergenomic comparisons highlight modularity of  
59 the denitrification pathway and underpin the importance of community structure for N<sub>2</sub>O  
60 emissions. *PLoS One* **9**: e114118.
- 61 Guisasola, A., Pijuan, M., Baeza, J.A., Carrera, J., Casas, C., and Lafuente, J. (2004) Aerobic  
62 phosphorus release linked to acetate uptake in bio-P sludge: process modeling using oxygen  
63 uptake rate. *Biotechnol Bioeng* **85**: 722-733.
- 64 Gurevich, A., Saveliev, V., Vyahhi, N., and Tesler, G. (2013) QAST: quality assessment tool  
65 for genome assemblies. *Bioinformatics* **29**: 1072-1075.
- 66 Hallin, S., Philippot, L., Löffler, F.E., Sanford, R.A., and Jones, C.M. (2018) Genomics and  
67 Ecology of Novel N<sub>2</sub>O-Reducing Microorganisms. *Trends Microbiol* **26**: 43-55.
- 68 Hassan, J., Qu, Z., Bergaust, L.L., and Bakken, L.R. (2016) Transient Accumulation of NO<sub>2</sub>-  
69 and N<sub>2</sub>O during Denitrification Explained by Assuming Cell Diversification by Stochastic  
70 Transcription of Denitrification Genes. *PLoS Comput Biol* **12**: e1004621.
- 71 Hu, Z., Wentzel, M.C., Ekama, G.A. (2002) Anoxic growth of phosphate-accumulating  
72 organisms in biological nutrient removal activated sludge systems. *Water Research* **36**: 4927-  
73 4937.
- 74 Hyatt, D., LoCasio, P.F., Hauser, L.J., and Uberbacher, E.C. (2012) Gene and translation  
75 initiation site prediction in metagenomic sequences. *Bioinformatics* **28**: 2223-2230.

- 76 Kampschreur, M.J., Temmink, H., Kleerebezem, R., Jetten, M.S., and van Loosdrecht, M.C.  
77 (2009) Nitrous oxide emission during wastewater treatment. *Water Res* **43**: 4093-4103.
- 78 Kanehisa, M., and Goto, S. (2000) KEGG: Kyoto Encyclopedia of Genes and Genomes. *Nucleic  
79 Acids Research* **28**: 27-30.
- 80 Katoh, K., and Standley, D.M. (2013) MAFFT multiple sequence alignment software version 7:  
81 improvements in performance and usability. *Mol Biol Evol* **30**: 772-780.
- 82 Kern-Jespersen, J.P., Henze, M. (1993) Biological phosphorus uptake under anoxic and aerobic  
83 conditions. *Water Research* **27**: 617-624.
- 84 Kindaichi, T., Yuri, S., Ozaki, N., and Ohashi, A. (2012) Ecophysiological role and function of  
85 uncultured Chloroflexi in an anammox reactor. *Water Sci Technol* **66**: 2556-2561.
- 86 Kragelund, C., Levantesi, C., Borger, A., Thelen, K., Eikelboom, D., Tandoi, V. et al. (2007)  
87 Identity, abundance and ecophysiology of filamentous Chloroflexi species present in activated  
88 sludge treatment plants. *FEMS Microbiol Ecol* **59**: 671-682.
- 89 Langmead, B., and Salzberg, S.L. (2012) Fast gapped-read alignment with Bowtie 2. *Nature  
90 Method* **9**: 357-359.
- 91 Lawson, C.E., Wu, S., Bhattacharjee, A.S., Hamilton, J.J., McMahon, K.D., Goel, R., and  
92 Noguera, D.R. (2017b) Metabolic network analysis reveals microbial community interactions in  
93 anammox granules. *Nat Commun* **8**: 15416.
- 94 Letunic, I., and Bork, P. (2016) Interactive tree of life (iTOL) v3: an online tool for the display  
95 and annotation of phylogenetic and other trees. *Nucleic Acids Res* **44**: W242-245.
- 96 Leventhal, G.E., Boix, C., Kuechler, U., Enke, T.N., Sliwerska, E., Holliger, C., and Cordero,  
97 O.X. (2018) Strain-level diversity drives alternative community types in millimetre-scale  
98 granular biofilms. *Nat Microbiol* **3**: 1295-1303.
- 99 Lilja, E.E., and Johnson, D.R. (2016) Segregating metabolic processes into different microbial  
100 cells accelerates the consumption of inhibitory substrates. *ISME J* **10**: 1568-1578.
- 101 Lombard, V., Ramulu, H.G., Drula, E., Coutinho, P.M., and Henrissat, B. (2014) The  
102 carbohydrate-active enzymes database (CAZy) in 2013. *Nucleic Acids Research* **42**: D490-D495.
- 103 Lu, H., Oehmen, A., Viridis, B., Keller, J., and Yuan, Z. (2006) Obtaining highly enriched  
104 cultures of *Candidatus Accumulibacter* phosphates through alternating carbon sources. *Water  
105 Res* **40**: 3838-3848.
- 106 Maldarelli, G.A., Piepenbrink, K.H., Scott, A.J., Freiberg, J.A., Song, Y., Achermann, Y. et al.  
107 (2016) Type IV pili promote early biofilm formation by *Clostridium difficile*. *Pathog Dis* **74**.

- 108 Martin, M. (2011) Cutadapt removes adapter sequences from high-throughput sequencing reads.  
109 *EMBnetJ* **17**: 10.
- 110 McIlroy, S.J., Albertsen, M., Andresen, E.K., Saunders, A.M., Kristiansen, R., Stockholm-  
111 Bjerregaard, M. et al. (2014) 'Candidatus Competibacter'-lineage genomes retrieved from  
112 metagenomes reveal functional metabolic diversity. *ISME J* **8**: 613-624.
- 113 McMahon, K.D., Yilmaz, S., He, S., Gall, D.L., Jenkins, D., Keasling, J.D. (2007)  
114 Polyphosphate kinase genes from full-scale activated sludge plants. *Applied and Environmental*  
115 *Microbiology* **77**: 167-173.
- 116 Meyer, F., Paarmann, D., D'Souza, M., Olson, R., Glass, E.M., Kubal, M. et al. (2008) The  
117 metagenomics RAST server – a public resource for the automatic phylogenetic and functional  
118 analysis of metagenomes. *BMC Bioinformatics* **9**: 386.
- 119 Nielsen, P.H., McIlroy, S.J., Albertsen, M., and Nierychlo, M. (2019) Re-evaluating the  
120 microbiology of the enhanced biological phosphorus removal process. *Curr Opin Biotechnol* **57**:  
121 111-118.
- 122 Oehmen, A., Yuan, Z., Blackall, L.L., Keller, J. (2004) Short-term effects of carbon source on  
123 the competition of polyphosphate accumulating organisms and glycogen accumulating  
124 organisms. *Water Science and Technology* **50**: 139-144.
- 125 Oehmen, A., Zeng, R.J., Yuan, Z., and Keller, J. (2005) Anaerobic metabolism of propionate by  
126 polyphosphate-accumulating organisms in enhanced biological phosphorus removal systems.  
127 *Biotechnol Bioeng* **91**: 43-53.
- 128 Oehmen, A., Lemos, P.C., Carvalho, G., Yuan, Z., Keller, J., Blackall, L.L., and Reis, M.A.  
129 (2007) Advances in enhanced biological phosphorus removal: from micro to macro scale. *Water*  
130 *Res* **41**: 2271-2300.
- 131 Oyserman, B.O., Noguera, D.R., del Rio, T.G., Tringe, S.G., and McMahon, K.D. (2016)  
132 Metatranscriptomic insights on gene expression and regulatory controls in Candidatus  
133 Accumulibacter phosphatis. *ISME J* **10**: 810-822.
- 134 Pan, Y., Ni, B.J., Bond, P.L., Ye, L., and Yuan, Z. (2013) Electron competition among nitrogen  
135 oxides reduction during methanol-utilizing denitrification in wastewater treatment. *Water Res* **47**:  
136 3273-3281.
- 137 Parks, D.H., Imelfort, M., Skennerton, C.T., Hugenholtz, P., and Tyson, G.W. (2015) CheckM:  
138 assessing the quality of microbial genomes recovered from isolates, single cells, and  
139 metagenomes. *Genome Research* **25**: 1043-1055.

- 140 Parks, D.H., Chuvochina, M., Waite, D.W., Rinke, C., Skarszewski, A., Chaumeil, P.A., and  
141 Hugenholtz, P. (2018) A standardized bacterial taxonomy based on genome phylogeny  
142 substantially revises the tree of life. *Nat Biotechnol* **36**: 996-1004.
- 143 Peng, Y., Leung, H.C., Yiu, S.M., and Chin, F.Y. (2012) IDBA-UD: a de novo assembler for  
144 single-cell and metagenomic sequencing data with highly uneven depth. *Bioinformatics* **28**:  
145 1420-1428.
- 146 Philippot, L., Andert, J., Jones, C.M., Bru, D., and Hallin, S. (2011) Importance of denitrifiers  
147 lacking the genes encoding the nitrous oxide reductase for N<sub>2</sub>O emissions from soil. *Global*  
148 *Change Biology* **17**: 1497-1504.
- 149 Philippot, L., Cuhel, J., Saby, N.P., Cheneby, D., Chronakova, A., Bru, D. et al. (2009) Mapping  
150 field-scale spatial patterns of size and activity of the denitrifier community. *Environ Microbiol*  
151 **11**: 1518-1526.
- 152 Quast, C., Pruesse, E., Yilmaz, P., Gerken, J., Schweer, T., Yarza, P. et al. (2013) The SILVA  
153 ribosomal RNA gene database project: improved data processing and web-based tools. *Nucleic*  
154 *Acids Res* **41**: D590-596.
- 155 Rubio-Rincon, F.J., Lopez-Vazquez, C.M., Welles, L., van Loosdrecht, M.C.M., and Brdjanovic,  
156 D. (2017) Cooperation between Candidatus Competibacter and Candidatus Accumulibacter clade  
157 I, in denitrification and phosphate removal processes. *Water Res* **120**: 156-164.
- 158 Rubio-Rincon, F.J., Weissbrodt, D.G., Lopez-Vazquez, C.M., Welles, L., Abbas, B., Albertsen,  
159 M. et al. (2019) "Candidatus Accumulibacter delftensis": A clade IC novel polyphosphate-  
160 accumulating organism without denitrifying activity on nitrate. *Water Res* **161**: 136-151.
- 161 Saier, M.H., Reddy, V.S., Tsu, B.V., Ahmed, M.S., Li, C., and Moreno-Hagelsieb, G. (2016)  
162 The Transporter Classification Database (TCDB): recent advances. *Nucleic Acids Research* **44**:  
163 D372-D379.
- 164 Schreiber, F., Wunderlin, P., Udert, K.M., and Wells, G.F. (2012) Nitric oxide and nitrous oxide  
165 turnover in natural and engineered microbial communities: biological pathways, chemical  
166 reactions, and novel technologies. *Front Microbiol* **3**: 372.
- 167 Seemann, T. (2014) Prokka: rapid prokaryotic genome annotation. *Bioinformatics* **30**: 2068-2069.
- 168 Shultis, D.D., Purdy, M.D., Banchs, C.N., Wiener, M.C. (2006) Outer Membrane Active  
169 Transport: Structure of the BtuB:TonB Complex. *Science* **312**: 1396-1398.
- 170 Skennerton, C.T., Barr, J.J., Slater, F.R., Bond, P.L., and Tyson, G.W. (2014) Expanding our  
171 view of genomic diversity in Candidatus Accumulibacter clades. *Environmental Microbiology*  
172 **17**: 1574-1585.

- 173 Speth, D.R., In 't Zandt, M.H., Guerrero-Cruz, S., Dutilh, B.E., and Jetten, M.S. (2016) Genome-  
174 based microbial ecology of anammox granules in a full-scale wastewater treatment system. *Nat*  
175 *Commun* **7**: 11172.
- 176 Stamatakis, A. (2014) RAxML version 8: a tool for phylogenetic analysis and post-analysis of  
177 large phylogenies. *Bioinformatics* **30**: 1312-1313.
- 178 Stokholm-Bjerregaard, M., McIlroy, S.J., Nierychlo, M., Karst, S.M., Albertsen, M., and Nielsen,  
179 P.H. (2017) A Critical Assessment of the Microorganisms Proposed to be Important to Enhanced  
180 Biological Phosphorus Removal in Full-Scale Wastewater Treatment Systems. *Front Microbiol*  
181 **8**: 718.
- 182 Wentzel M.C., Lotter L.H., Loewenthal. R.E., Marais GvR (1986) Metabolic behaviour of  
183 *Acinetobacter* spp. in enhanced biological phosphorus removal - a biochemical model. *Water SA*  
184 **12**.
- 185 Weissbrodt, D.G., Lochmatter, S., Ebrahimi, S., Rossi, P., Maillard, J., and Holliger, C. (2012)  
186 Bacterial Selection during the Formation of Early-Stage Aerobic Granules in Wastewater  
187 Treatment Systems Operated Under Wash-Out Dynamics. *Front Microbiol* **3**: 332.
- 188 Wertz, S., Goyer, C., Burton, D.L., Zebarth, B.J., and Chantigny, M.H. (2018) Processes  
189 contributing to nitrite accumulation and concomitant N<sub>2</sub>O emissions in frozen soils. *Soil Biology*  
190 *and Biochemistry* **126**: 31-39.
- 191 Wisniewski, K., Kowalski, M., and Makinia, J. (2018) Modeling nitrous oxide production by a  
192 denitrifying-enhanced biologically phosphorus removing (EBPR) activated sludge in the  
193 presence of different carbon sources and electron acceptors. *Water Res* **142**: 55-64.
- 194 Yilmaz, P., Parfrey, L.W., Yarza, P., Gerken, J., Pruesse, E., Quast, C. et al. (2014) The SILVA  
195 and "All-species Living Tree Project (LTP)" taxonomic frameworks. *Nucleic Acids Research* **42**:  
196 D643-D648.
- 197 Yu, C., Lin, C.J., and Hwang, J.K. (2004) Predicting subcellular localization of proteins for  
198 Gram-negative bacteria by support vector machines based onn-peptide compositions. *Protein*  
199 *Science* **13**: 1402-1406.
- 200 Zhang, A., Mao, Y., and Zhang, T. (2016) Development of Quantitative Real-time PCR Assays  
201 for Different Clades of "Candidatus Accumulibacter". *Sci Rep* **6**: 23993.
- 202 Zhang, A., Mao, Y., Wang, Y., and Zhang, T. (2019) Mining traits for the enrichment and  
203 isolation of not-yet-cultured populations. *Microbiome* **7**: 96.
- 204 Zhou, Y., Lim, M., Harjono, S., and Ng, W.J. (2012) Nitrous oxide emission by denitrifying  
205 phosphorus removal culture using polyhydroxyalkanoates as carbon source. *Journal of*  
206 *Environmental Sciences* **24**: 1616-1623.

207 Zumft, W.G. (1997) Cell Biology and Molecular Basis of Denitrification. *Microbiology and*  
208 *Molecular Biology Reviews* **61**: 533-616.

209
